1 **Members of the ELMOD protein family specify formation of distinct aperture domains on**  
2 **the Arabidopsis pollen surface**

3 Yuan Zhou<sup>1</sup>, Prativa Amom<sup>1,2</sup>, Sarah H. Reeder<sup>1</sup>, Byung Ha Lee<sup>1,3</sup>, Adam Helton<sup>1,4</sup>, and Anna A.  
4 Dobritsa<sup>1,\*</sup>

5 <sup>1</sup>Department of Molecular Genetics and Center for Applied Plant Sciences, Ohio State  
6 University, Columbus, OH 43210, USA

7 <sup>2</sup>Present address: Cincinnati Children's Hospital Medical Center, University of Cincinnati,  
8 Cincinnati, OH 45229, USA

9 <sup>3</sup>Present address: Macrogen, Inc., 238, Teheran-ro, Gangnam-gu, Seoul, 06221, Republic of  
10 Korea

11 <sup>4</sup>Present address: PPD Laboratories, 3230 Deming Way, Middleton, WI 53562, USA

12 \*For correspondence: [dobritsa.1@osu.edu](mailto:dobritsa.1@osu.edu)

13 **Abstract**

14 Pollen apertures, the characteristic gaps in pollen wall exine, have emerged as a model for  
15 studying the formation of distinct plasma-membrane domains. In each species, aperture number,  
16 position, and morphology are typically fixed; across species they vary widely. During pollen  
17 development certain plasma-membrane domains attract specific proteins and lipids and become  
18 protected from exine deposition, developing into apertures. However, how these aperture  
19 domains are selected is unknown. Here, we demonstrate that patterns of aperture domains in  
20 *Arabidopsis* are controlled by the members of the ancient ELMOD protein family, which,  
21 although important in animals, has not been studied in plants. We show that two members of this  
22 family, MACARON (MCR) and ELMOD\_A, act upstream of the previously discovered aperture  
23 proteins and that their expression levels influence the number of aperture domains that form on  
24 the surface of developing pollen grains. We also show that a third ELMOD family member,  
25 ELMOD\_E, can interfere with MCR and ELMOD\_A activities, changing aperture morphology  
26 and producing new aperture patterns. Our findings reveal key players controlling early steps in  
27 aperture domain formation, identify residues important for their function, and open new avenues  
28 for investigating how diversity of aperture patterns in nature is achieved.

29

30

## 31 Introduction

32 As part of cell morphogenesis, cells often form distinct plasma-membrane domains that acquire  
33 specific combinations of proteins, lipids, and extracellular materials. Yet how these domains are  
34 selected and specified is often unclear. Pollen apertures offer a powerful model for studying this  
35 process. Apertures are the characteristic gaps on the pollen surface that receive little to no  
36 deposition of the pollen wall exine; during their formation certain regions of the plasma  
37 membrane are selected and specified as aperture domains (Zhou and Dobritsa, 2019). Pollen  
38 apertures create some of the most recognizable patterns on the pollen surface, usually conserved  
39 within a species but highly variable across species (Furness and Rudall, 2004). For instance, in  
40 wild-type *Arabidopsis* pollen, apertures are represented by three long and narrow furrows,  
41 equally spaced on the pollen surface and oriented longitudinally (Figure 1A–1A'). In other  
42 species, aperture positions, number, and morphologies can be different, suggesting the  
43 mechanisms guiding aperture formation are diverse. While the diversity of aperture patterns has  
44 captivated scientists for decades (Furness and Rudall, 2004; Matamoro-Vidal et al., 2016;  
45 Walker, 1974; Wodehouse, 1935), studies of the associated molecular mechanisms have only  
46 recently begun (Dobritsa and Coerper, 2012; Dobritsa et al., 2018; Lee et al., 2018; Reeder et al.,  
47 2016; Zhang et al., 2020).

48 Aperture domains first become visible at the tetrad stage of pollen development, when four sister  
49 microspores, the products of meiosis, are held together under the common callose wall and  
50 aperture factors, such as INAPERTURATE POLLEN1 (INP1) and D6 PROTEIN KINASE-  
51 LIKE3 (D6PKL3) in *Arabidopsis* and OsINP1 and DEFECTIVE IN APERTURE  
52 FORMATION1 (OsDAF1) in rice, accumulate at distinct domains of the microspore plasma  
53 membranes (Dobritsa and Coerper, 2012; Dobritsa et al., 2018; Lee et al., 2018; Zhang et al.,  
54 2020). These domains become protected from exine deposition and develop into apertures  
55 (Dobritsa et al., 2018; Zhang et al., 2020). Yet how aperture domains are selected and what  
56 mechanism guides their patterning remains completely unknown.

57 Recently, we isolated a new *Arabidopsis* mutant, *macaron* (*mcr*), in which pollen, instead of  
58 forming three apertures, develops a single ring-shaped aperture, suggesting that the affected gene  
59 is involved in specifying positions and number of aperture domains (Plourde et al., 2019). Here,  
60 we perform a detailed analysis of this mutant and identify the *MCR* gene. We demonstrate that it

61 belongs to the ancient family of ELMOD proteins, and that together with another member of this  
62 protein family in Arabidopsis, ELMOD\_A, MCR acts at the beginning of the aperture formation  
63 pathway as a positive regulator of aperture domain specification. We provide evidence that  
64 aperture domains are highly sensitive to the levels of MCR and ELMOD\_A, which can  
65 positively or negatively affect their number. We further demonstrate that a third member of this  
66 family, ELMOD\_E, has an ability to influence the number, positions, and morphology of  
67 aperture domains, and we identify specific protein residues critical for this ability. Our study  
68 elucidates key molecular factors controlling aperture patterning and functionally characterizes  
69 members of the widespread, yet thus far neglected family of the plant ELMOD proteins.

70

## 71 **Results**

### 72 ***mcr* mutants develop a single ring-shaped pollen aperture composed of two equidistantly** 73 **placed longitudinal apertures**

74 In a screen of EMS-mutagenized Arabidopsis plants, we discovered four non-complementing  
75 mutants which, instead of three equidistant pollen apertures, produced a single ring-shaped  
76 aperture dividing each pollen grain into two equal parts (Figure 1B–1E'). As the mutant  
77 phenotype resembled the French meringue dessert, we named these mutations *macaron* (alleles  
78 *mcr-1* through *mcr-4*).

79 Imaging of *mcr* microspore tetrads demonstrated that they develop normally and achieve a  
80 regular tetrahedral conformation. The ring-shaped aperture domains in *mcr* microspores,  
81 visualized with the help of the reporter INP1-YFP, are positioned so that they pass through the  
82 proximal and distal poles of each microspore (Figure 1G; compare with the INP1-YFP  
83 localization in the absence of *mcr* mutation in Figure 1F). Thus, like in wild-type pollen,  
84 apertures in *mcr* are placed longitudinally. However, while aperture positions in each wild-type  
85 microspore are coordinated with aperture positions in its three sisters (Dobritsa et al., 2018;  
86 Reeder et al., 2016), in *mcr*, the ring-shaped apertures appear to be placed independently in sister  
87 microspores (Figure 1—figure supplement 1). Occasionally, instead of ring-shaped apertures,  
88 *mcr* pollen displays two unconnected apertures (Figure 1H–1H'), suggesting that the ring-shaped  
89 aperture is a product of a two-aperture fusion. Thus, *mcr* mutations reduce the number of

90 apertures, but do not affect their furrow morphology, longitudinal orientation, and equidistant  
91 placement.

### 92 **The *mcr* mutation reduces aperture number across different levels of ploidy and** 93 **arrangements of microspores**

94 We previously showed that aperture number strongly depends on microspore ploidy and is  
95 sensitive to cytokinetic defects that disrupt formation of normal tetrahedral tetrads, creating other  
96 arrangements of post-meiotic microspores (Reeder et al., 2016). While normal haploid (1n)  
97 pollen develops three apertures, diploid (2n) pollen produces either four or a mixture of four and  
98 six apertures, depending on whether it was generated through tetrads or dyads. In contrast, 2n  
99 *mcr* pollen, produced through either tetrads or dyads, has three equidistant apertures (Plourde et  
100 al., 2019), suggesting that the increasing effect of higher ploidy on aperture number is  
101 counterbalanced by the defect in the *MCR* function.

102 We have now extended this analysis by assessing the effects of the *mcr* mutation on aperture  
103 formation under additional perturbations of ploidy or post-meiotic microspore arrangement. By  
104 creating 1n *Mitosis instead of Meiosis* (*MiMe*) plants (d'Erfurth et al., 2009) with the *mcr*  
105 mutation, we generated *mcr* pollen with normal ploidy (1n) via dyads, and not tetrads. As shown  
106 previously (Reeder et al., 2016), a majority of the 1n *MiMe* pollen grains (~60%) develop three  
107 normal apertures, with the rest forming mostly six apertures (Figure 1I, Figure 1—figure  
108 supplement 2A–C'). Yet, in the pollen of the 1n *mcr MiMe* plants the number of apertures was  
109 reduced, with ~50-70% of pollen developing the *mcr* phenotype (either ring-shaped or two  
110 apertures) and the rest forming three apertures (Figure 1I, Figure 1—figure supplement 2D–E').

111 We further perturbed microspore formation and ploidy by crossing *mcr-1* with a mutant  
112 defective in the *TETRASPORE* (*TES*) gene. In *tes* mutants, microspore mother cells (MMCs) go  
113 through meiosis but fail to undergo cytokinesis, producing large pollen grains with four haploid  
114 nuclei and a high number (~10 or more) of irregularly placed and fused apertures (Reeder et al.,  
115 2016; Spielman et al., 1997). Although in the double *mcr tes* mutant apertures are often  
116 positioned irregularly and fused together, their number was usually lower (~4-6) than in the  
117 single *tes* mutant (Figure 1—figure supplement 2F–G'). Altogether, these results indicate that  
118 *mcr* mutations have an overall reducing effect on aperture number, manifested across different  
119 levels of pollen ploidy and post-meiotic microspore arrangements.

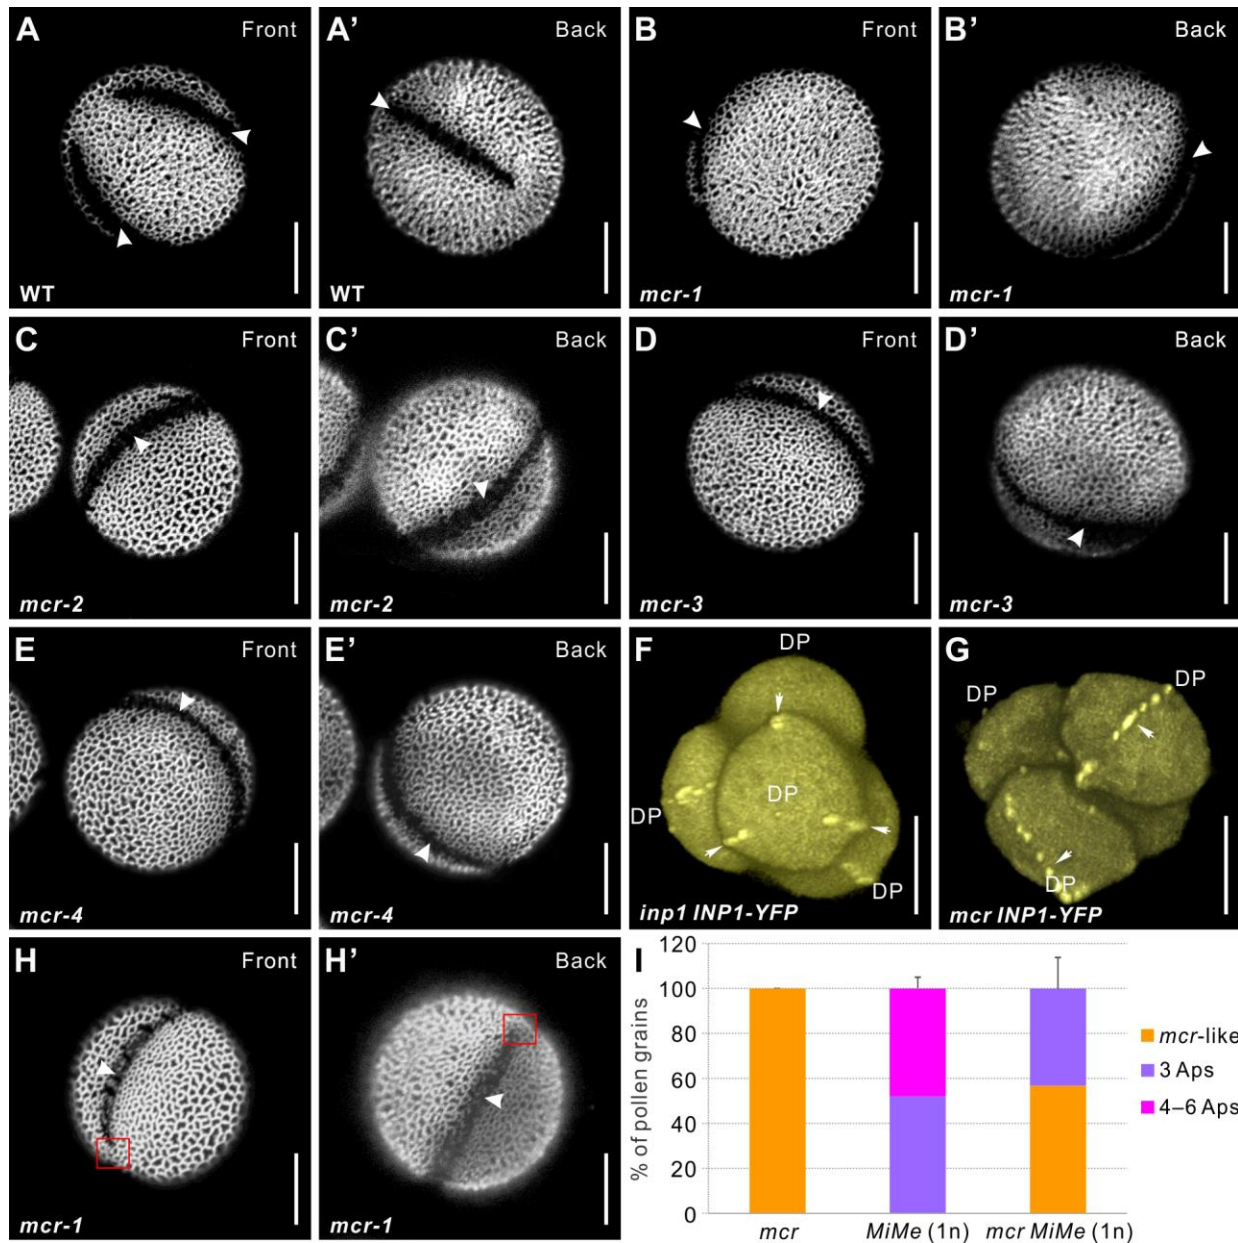

120

121 **Figure 1.** Mutations in *MCR* reduce aperture number. (A–E') Confocal images of auramine O-stained pollen grains  
 122 from wild type (*Ler*) and four *mcr* EMS mutants. Front ( $\alpha$ ) and back ( $\alpha'$ ) show the opposite views of the same  
 123 pollen grain here and in other figures as indicated. (F–G) 3-D reconstructions of tetrad-stage microspores showing  
 124 lines of INP1-YFP (arrows) in *inp1* and *mcr* mutants. DP, distal pole. (H–H') *mcr* pollen with two apertures. Red  
 125 boxes mark the regions where apertures are not fused. (I) Percentage of pollen grains with indicated number of  
 126 apertures in pollen populations from *mcr*, 1n *MiMe*, and 1n *mcr MiMe* plants (n = 75–500). Error bars represent SD,  
 127 calculated from 4–6 independent biological replicates. Apertures are indicated with arrowheads in (A–E') and (H–  
 128 H'). Scale bars, 10  $\mu$ m.

129



130 ***MCR* acts genetically upstream of the aperture factors *INP1* and *D6PKL3***

131 In wild-type tetrad-stage microspores, aperture factors *INP1* and *D6PKL3* localize to the three  
132 longitudinal aperture domains of the plasma membrane (Dobritsa and Coerper, 2012; Dobritsa et  
133 al., 2018; Lee et al., 2018). Since *mcr* mutation affects *INP1*-YFP localization, causing it to  
134 migrate to a ring-shaped membrane domain (Figure 1G), we tested whether *mcr* also affects the  
135 localization of *D6PKL3*, which likely acts upstream of *INP1*. We introgressed the previously  
136 characterized transgenic reporter *D6PKL3pr:D6PKL3-YFP* (Lee et al., 2018) into the *mcr-1*  
137 background. In *mcr* microspores, *D6PKL3*-YFP re-localized to a single ring-shaped domain  
138 (Figure 2A), indicating that *MCR* acts upstream of both *INP1* and *D6PKL3*.

139 We also examined the genetic interactions between *MCR* and other aperture factors, including  
140 the recently discovered *INP2* (Lee et al., 2021), by combining their mutations. *d6pkl3* single  
141 mutants develop three apertures partially covered by exine (Lee et al., 2018). Pollen of the *mcr*  
142 *d6pkl3* double mutants developed single ring-shaped apertures that were partially covered by  
143 exine, indicating that the two genes have an additive effect on aperture phenotype (Figure 2B). In  
144 contrast, pollen grains of *mcr inp1* and *mcr inp2* completely lacked apertures, phenocopying  
145 single *inp1* and *inp2* mutants (Dobritsa and Coerper, 2012; Lee et al., 2021) (Figure 2C and 2D).  
146 This indicates that *INP1* and *INP2* are epistatic to *MCR*, consistent with their roles of factors  
147 absolutely essential for aperture formation.

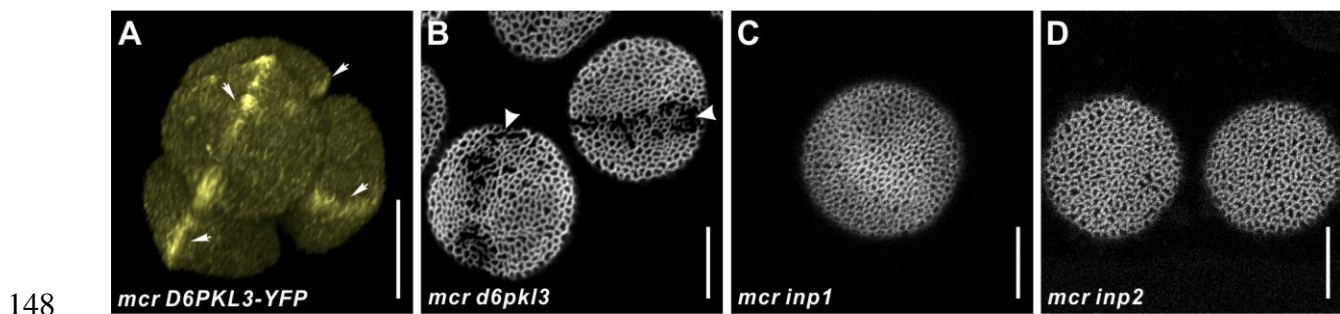

149 **Figure 2.** *MCR* acts genetically upstream of the three known aperture factors, *D6PKL3*, *INP1* and *INP2*. (A) 3-D  
150 reconstruction of tetrad-stage microspores showing lines of *D6PKL3*-YFP in *mcr* tetrads. (B–D) Pollen grains of  
151 *mcr d6pkl3*, *mcr inp1*, and *mcr inp2* double mutants. Apertures are indicated with arrowheads and *D6PKL3*-YFP  
152 lines are indicated with arrows. Scale bars, 10  $\mu$ m.

153 ***MCR* is a member of the ancient ELMOD protein family**

154 We mapped the *mcr-1* defect to a 77-kb interval on the second chromosome. One of the 25 genes  
155 in this interval, *At2g44770*, had a C-to-T mutation converting a highly conserved Pro165 (see  
156 below) into a Ser (Figure 3A, Figure 3—figure supplement 1). Sequencing of *At2g44770* from  
157 the other three *mcr* alleles also revealed mutations (Figure 3A, Figure 3—figure supplement 1).  
158 *mcr-2* had a G-to-A mutation converting Gly129 into an Asp. *mcr-3* had a G-to-A mutation  
159 affecting the last nucleotide of the fifth intron, disrupting the splice acceptor site and causing a  
160 frame shift in the middle of the critical catalytic region (see below). In *mcr-4*, no mutations in the  
161 coding sequence (CDS) of *At2g44770* were found; however, there was a G-to-A mutation 310 nt  
162 downstream of the stop codon in its 3' untranslated region (3' UTR), suggesting that the 3' UTR  
163 is important for regulation of this gene (Figure 3A). In addition, plants with T-DNA insertions in  
164 this gene (*mcr-5*, *mcr-6*, and *mcr-7*) all produced pollen with the *mcr* phenotype (Figure 3A,  
165 Figure 3—figure supplement 2). The T-DNA mutations, however, were hypomorphic, as some  
166 pollen with three normal apertures was found in their populations (9% in *mcr-5* (n=179), 13% in  
167 *mcr-6* (n=216), and 22% in *mcr-7* (n=78) vs. 0% in *mcr-1* (n=120)).

168 We further verified the identity of *MCR* as *At2g44770* by creating complementation constructs  
169 and expressing them in the *mcr-1* mutant. The genomic construct *MCRpr:gMCR* (driven by the  
170 3-kb DNA fragment upstream of the start codon (referred to as the *MCR* promoter) and  
171 containing introns and the 0.8-kb region downstream of the stop codon) restored three normal  
172 apertures in 10/10 T<sub>1</sub> transgenic plants (Figure 3B–3B'). A similar genomic construct expressing  
173 protein fused at the C-terminus with Yellow Fluorescent protein (YFP) also successfully restored  
174 apertures (Figure 3C–3C'). In contrast, the *MCRpr:MCR CDS* construct, which contained only  
175 the CDS driven by the *MCR* promoter, did not rescue the *mcr* phenotype (0/6 T<sub>1</sub> plants had three  
176 apertures restored) (Figure 3D–3D'), indicating that additional regulatory regions are required  
177 for expression of this gene, consistent with the notion of the 3' UTR importance. The *MCR*  
178 promoter and 3' UTR were then included in all constructs for which we sought *MCR*-like  
179 expression and are herein referred to as the *MCR* regulatory regions.

180 The protein encoded by *At2g44770* contains the Engulfment and Cell Motility (ELMO) domain  
181 (InterPro006816) (Figure 3A, Figure 3—figure supplement 1). In animals, proteins with this  
182 domain belong to two families: (1) smaller ELMOD proteins, containing only the ELMO domain



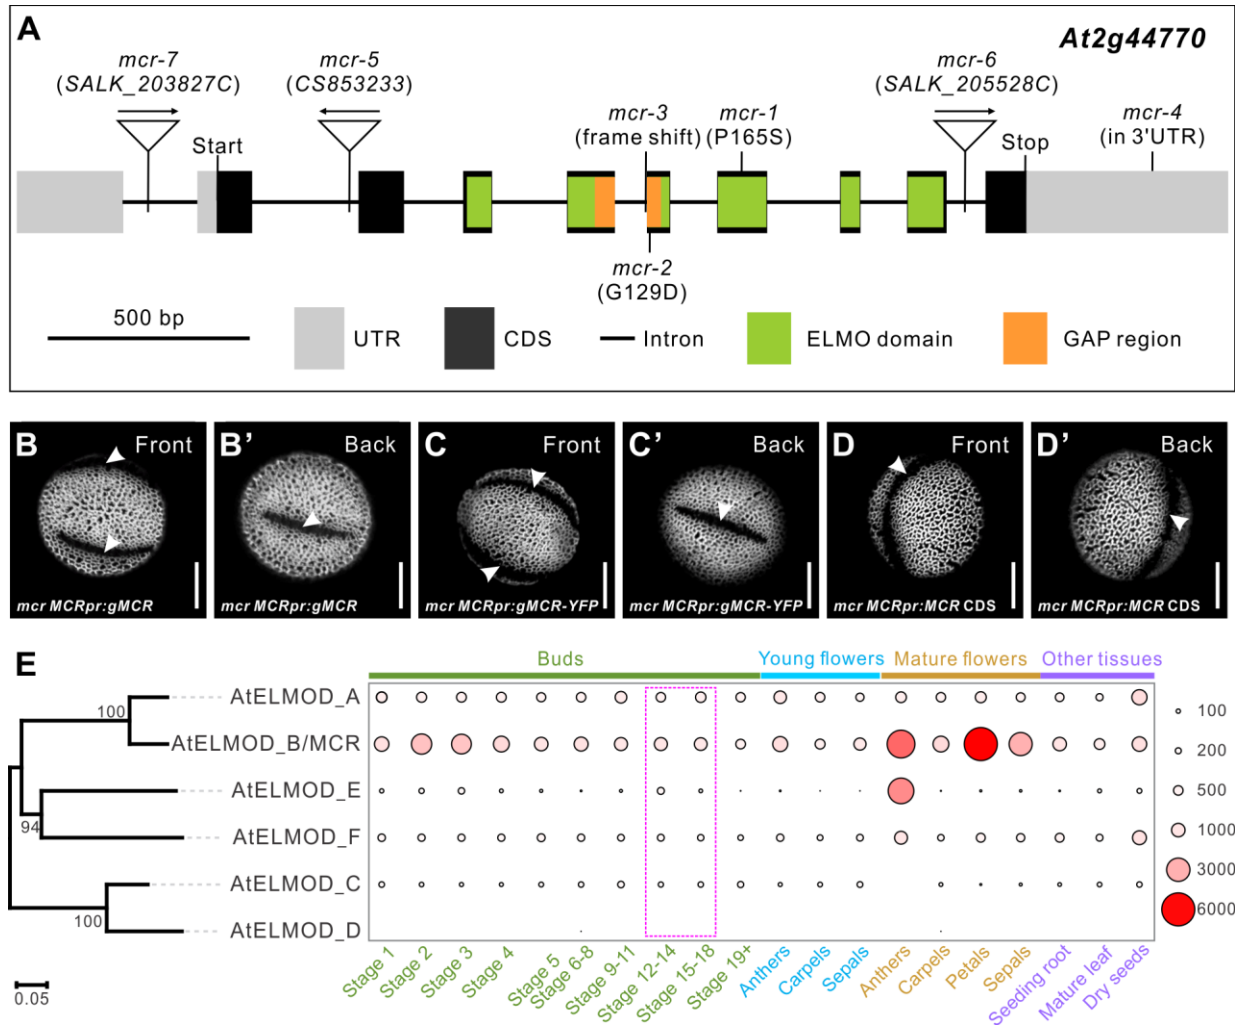

183

184 **Figure 3.** MCR, a member of the ELMOD protein family, is encoded by *At2g44770*. (A) Diagram of the *MCR* gene  
 185 (*At2g44770*). Positions of seven mutations and several gene and protein regions are indicated. (B–D') Pollen grains  
 186 from *mcr* plants expressing *MCRpr:gMCR*, *MCRpr:gMCR-YFP*, and *MCRpr:MCR CDS* constructs. Apertures are  
 187 indicated with arrowheads. Scale bars, 10  $\mu$ m. (E) Phylogenetic tree of the Arabidopsis ELMOD proteins and  
 188 expression patterns of the corresponding genes. Bootstrap values (%) for 1,000 replicates are shown at tree nodes.  
 189 RNA-seq data obtained from the TRAVA database are presented as a bubble heatmap (values indicate normalized  
 190 read counts). Magenta box marks the bud stages associated with pollen aperture formation (stages follow the  
 191 TRAVA nomenclature).

192

193 and (2) larger ELMO proteins, containing, besides the ELMO domain, several other protein  
 194 domains (East et al., 2012). The ELMOD family is believed to be the more ancient, with  
 195 ELMOD proteins already present in the last common ancestor of all eukaryotes, whereas ELMO  
 196 proteins appeared later in evolution in the opisthokont clade (East et al., 2012). In mammals,

197 ELMOD proteins act as non-canonical GTPase activating proteins (GAPs) for regulatory  
198 GTPases of the ADP-ribosylation factor (Arf) family, a subgroup within the Ras superfamily that  
199 includes Arf and Arf-like (Arl) proteins (Bowzard et al., 2007; Ivanova et al., 2014; Turn et al.,  
200 2020). Unlike animals, plants only have members of the ELMOD family, and their roles remain  
201 essentially uncharacterized.

202 **Another member of the Arabidopsis ELMOD family, ELMOD\_A, is also involved in**  
203 **aperture formation**

204 In Arabidopsis, the ELMOD family consists of six members, ELMOD\_A through ELMOD\_F  
205 (Figure 3E, Figure 3—figure supplement 1), in the nomenclature of (East et al., 2012). MCR is  
206 ELMOD\_B. One of the other five proteins, ELMOD\_A, shares 86% sequence identity with  
207 MCR, and the rest have ~50-55% sequence identity with both MCR and ELMOD\_A. Although  
208 the ELMOD proteins are broadly expressed in Arabidopsis, young buds at or near the stages  
209 when apertures develop express mostly MCR and ELMOD\_A (Figure 3E).

210 Given the high similarity between MCR and ELMOD\_A, we wondered if ELMOD\_A also aids  
211 in aperture formation. We disrupted ELMOD\_A with CRISPR/Cas9 (Figure 4A), but it did not  
212 affect aperture formation (Figure 4B–4B'). We hypothesized that the lack of phenotype could be  
213 due to the ELMOD\_A redundancy with MCR. To test this, we crossed the *elmod\_a* mutant  
214 (carrying the CRISPR/Cas9 transgene) with the *mcr-1* mutant. Already in the F<sub>1</sub> generation,  
215 when all plants were expected to be double heterozygotes, we found several plants producing  
216 pollen with the *mcr*-like aperture phenotype (Figure 4C–4C'). Sequencing of the *MCR* and  
217 *ELMOD\_A* genes from these plants showed that, as expected, they were heterozygous for *MCR*;  
218 however, they had homozygous or biallelic mutations in *ELMOD\_A*, indicating that the  
219 CRISPR/Cas9 transgene continued targeting the wild-type copy of *ELMOD\_A* in the F<sub>1</sub> progeny  
220 of the cross.

221 The phenotype of these *mcr/+ elmod\_a* mutants revealed that in the absence of *ELMOD\_A*,  
222 *MCR* displays haploinsufficiency. Notably, when at least one wild-type copy of *ELMOD\_A* is  
223 present, *MCR* is haplosufficient (Figure 4D–4D'). Therefore, these paralogs play redundant roles  
224 in the formation of aperture domains. Yet, since MCR can specify three normal apertures in the  
225 absence of ELMOD\_A but not vice versa, its role appears to be more prominent compared to  
226 that of ELMOD\_A.

227 We also tested how the lack of one copy of *ELMOD\_A* and both copies of *MCR*, as well as the  
228 lack of both genes, would affect aperture formation. In the *mcr elmod\_a/+* plants, pollen had the  
229 *mcr* phenotype (Figure 4E–4E’). However, when both genes were completely disrupted, the  
230 resulting pollen produced either one greatly disrupted aperture with an abnormal, circular  
231 morphology and partially covered with exine, or formed no apertures (Figures 4F–4G’). Thus,  
232 the simultaneous loss of the two *ELMOD* family genes has a synergistic effect on aperture  
233 formation.

234 To confirm that these defects were caused by mutations in *ELMOD\_A* and not off-site CRISPR  
235 targeting events, as well as to identify the *ELMOD\_A* regulatory regions, we created two  
236 *ELMOD\_A* genomic constructs driven by the 2-kb region upstream of its start codon –  
237 *EApr:gELMOD\_A* (which also included a 0.3-kb *ELMOD\_A* 3’ UTR) and *EApr:gELMOD\_A-*  
238 *YFP* (tagged with YFP and lacking the *ELMOD\_A* 3’ UTR) – and transformed them into the *mcr*  
239 *elmod\_a* double mutant, which no longer carried the CRISPR/Cas9 transgene. Both constructs  
240 successfully rescued formation of apertures (5/5 and 31/33 T<sub>1</sub> plants, respectively, Figure 4H–  
241 4I’), indicating the selected promoter region is sufficient for *ELMOD\_A* functional expression. In  
242 addition, when *ELMOD\_A* was expressed in the *mcr* single mutant from either its own promoter  
243 or from the *MCR* regulatory regions (*MCRpr:gELMOD\_A-YFP-MCR3’UTR*), it also  
244 complemented the loss of *MCR* (12/12 and 14/14 T<sub>1</sub> plants) (Figures 4J–4K’).

245 Thus, both *ELMOD\_A* and *MCR* participate in aperture domain specification. Formation of  
246 three apertures in Arabidopsis pollen requires either two intact copies of *MCR* or at least one  
247 copy of each of these two *ELMOD* family members.

#### 248 ***MCR* and *ELMOD\_A* are expressed in the developing pollen lineage but, unlike other** 249 **aperture factors, do not accumulate at the aperture membrane domains**

250 According to the publicly available RNA-seq data (Klepikova et al., 2016), *MCR* and *ELMOD\_A*  
251 are both expressed in young buds with pollen at or near the tetrad stage of development (Figure  
252 3E). To confirm that in these buds *MCR* and *ELMOD\_A* are expressed in the developing pollen  
253 lineage, we created transcriptional reporter constructs *MCRpr:H2B-RFP* and *EApr:H2B-RFP*,  
254 expressing the nuclear marker H2B tagged with Red Fluorescent Protein, and transformed them  
255 into wild-type Arabidopsis. In the resulting transgenic lines, *MCR* and *ELMOD\_A* promoters  
256 were

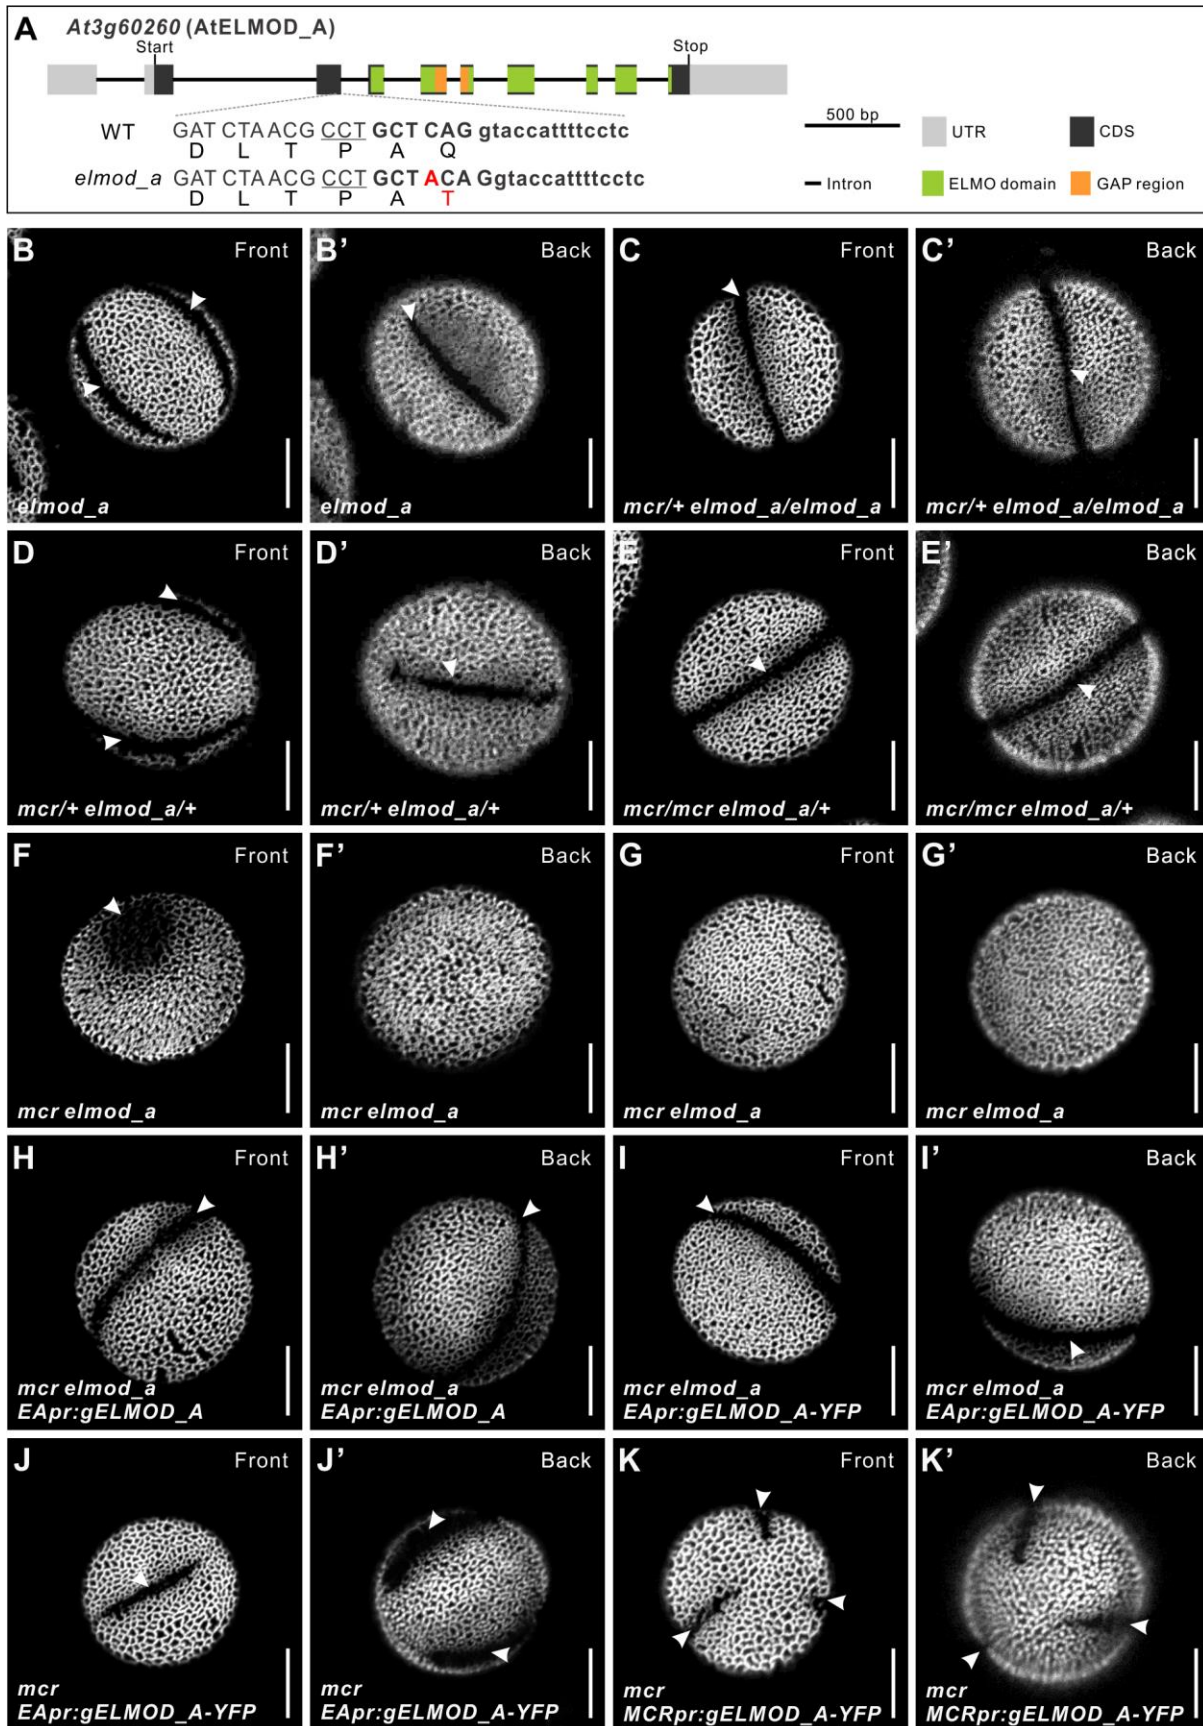



258 **Figure 4.** ELMOD\_A is involved in aperture formation. (A) Diagram of the *ELMOD\_A* gene (*At3g60260*) and the  
259 CRISPR/Cas9-induced *elmod\_a* mutation. Nucleotide and amino acid changes are indicated with red capital letters.  
260 20-bp target sequence next to the underlined protospacer adjacent motif is shown in bold. Lowercase letters  
261 represent sequence of an intron. (B–G') Pollen grains from *elmod\_a* mutant and from the indicated homo- and  
262 heterozygous combinations of *elmod\_a* and *mcr* mutations. (H–I') Pollen grains from *mcr elmod\_a* plants  
263 expressing *EApr:gELMOD\_A* and *EApr:gELMOD\_A-YFP* constructs. (J–K') Pollen grains from *mcr* plants  
264 expressing *EApr:gELMOD\_A-YFP* and *MCRpr:gELMOD\_A-YFP* constructs. Apertures are indicated with  
265 arrowheads. Scale bars, 10  $\mu$ m.

266

267 active in the developing pollen lineage (MMCs, tetrads, and young free microspores) as well as  
268 in somatic anther layers (Figure 5A).

269 To find out if, like the previously discovered aperture factors INP1 and D6PKL3, MCR and  
270 ELMOD\_A accumulate at the aperture domains of tetrad-stage microspores, we determined the  
271 subcellular localization of the YFP-tagged proteins expressed from the translational reporters  
272 *MCRpr:gMCR-YFP* and *EApr:gELMOD\_A-YFP*, which rescued mutant phenotypes. Consistent  
273 with the results from the transcriptional reporters, the YFP signal was present in MMCs, tetrads,  
274 and young microspores (Figure 5B–5C). This signal was diffusely localized in the cytoplasm and  
275 prominently enriched in the nucleoplasm. No specific enrichment near the plasma membrane  
276 was observed. Therefore, MCR and ELMOD\_A specify positions and number of aperture  
277 domains without visibly congregating there.

#### 278 **Invariant arginine in the putative GAP region is essential for MCR and ELMOD\_A** 279 **functions**

280 Although ELMOD proteins do not have the typical GAP domain associated with the canonical  
281 Arf GAP proteins, they contain a conserved stretch of 26 amino acids, with 13 residues  
282 exhibiting a particularly high degree of conservation and forming the consensus sequence  
283  $WX_3G(F/W)QX_3PXTD(F/L)RGXGX_3LX_2L$ . In mammalian ELMODs this region is proposed to  
284 mediate their Arf/Arl GAP activity (East et al., 2012). The presence of the invariant Arg in this  
285 region is of particular importance since the activity of many GAP proteins of the Ras GTPase  
286 superfamily, including canonical Arf GAPs, relies on a catalytic Arg (Scheffzek et al., 1998).

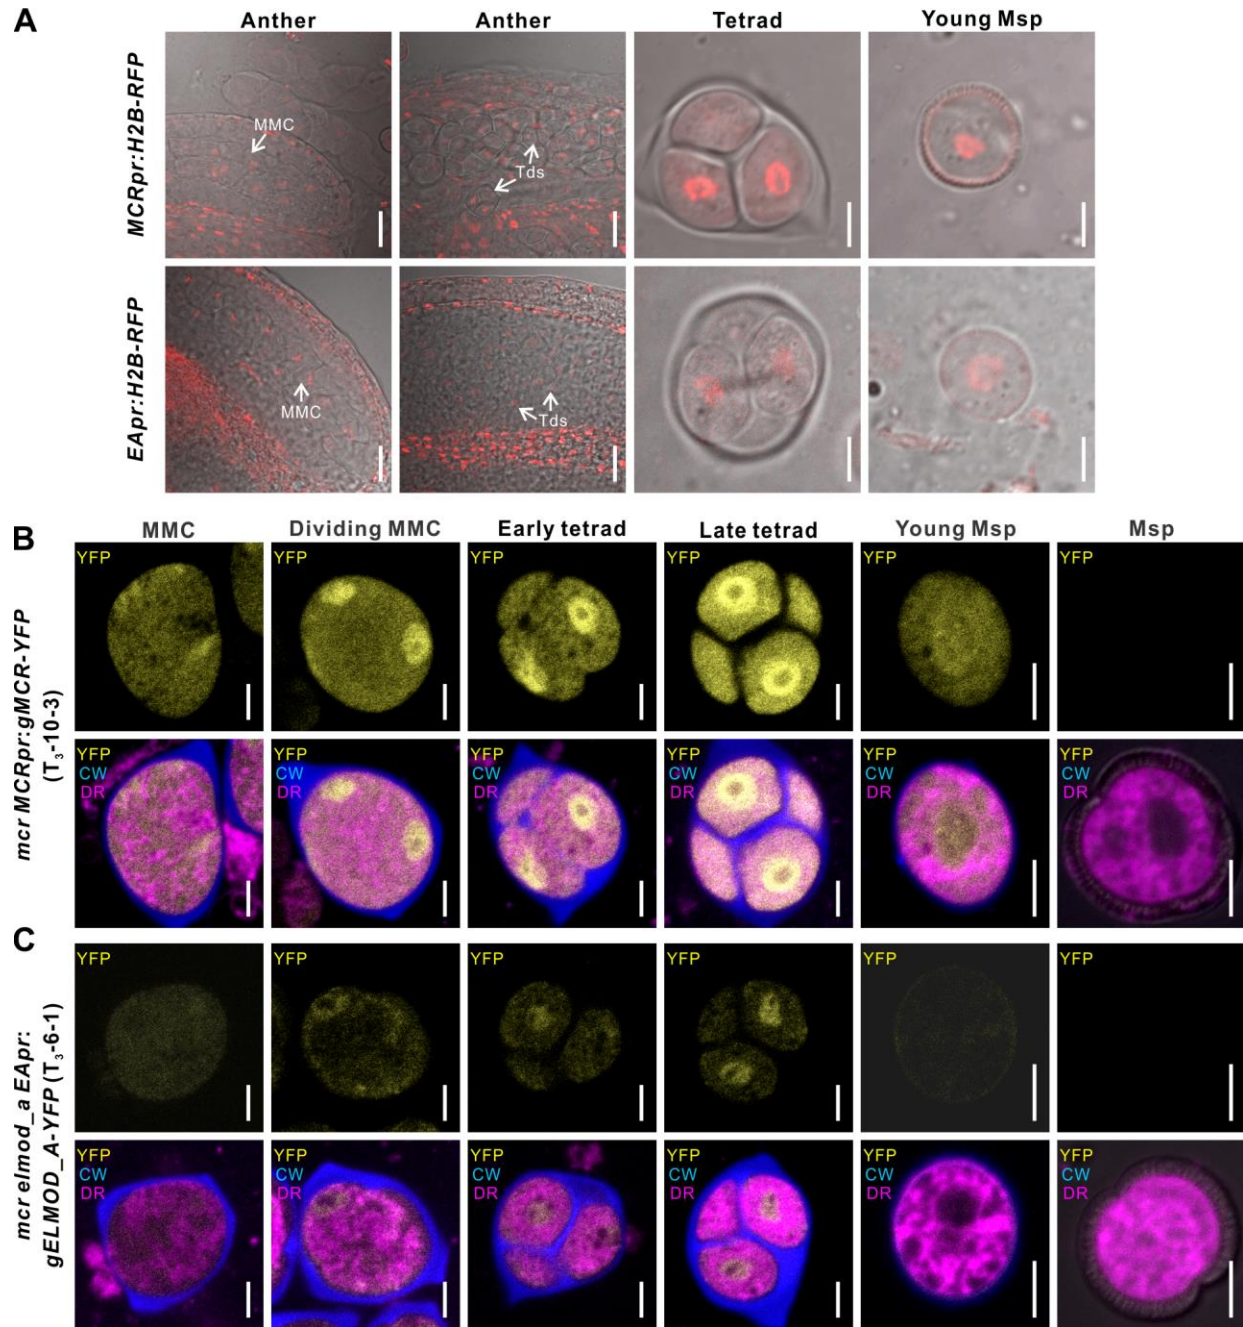

287

288 **Figure 5.** MCR and ELMOD\_A do not accumulate at the aperture membrane domains. (A) Confocal images of  
 289 wild-type anthers, tetrads, and young microspores expressing *MCRpr:H2B-RFP* (upper panels) and *EApr:H2B-RFP*  
 290 (lower panels). Scale bars, 20  $\mu$ m for anthers and 5  $\mu$ m for tetrads and young microspores. (B–C) Confocal images  
 291 of cells in the developing pollen lineage from *mcr MCRpr:gMCR-YFP* (B) and *mcr elmod\_a EApr:gELMOD\_A-*  
 292 *YFP* (C) plants. Upper panels: YFP signal. Lower panels: merged signal from YFP (yellow), Calcofluor White  
 293 (blue, callose wall) and CellMask Deep Red (magenta, membranous structures). Scale bars, 5  $\mu$ m. Identical staining  
 294 and color scheme are used for similar images of tetrads in other figures. Abbreviations: CW, Calcofluor White; DR,  
 295 CellMask Deep Red; MMC, microspore mother cell; Msp, microspore, Td, Tetrad.



296 Indeed, in mammalian ELMODs, the Arg in this putative GAP region was shown to be essential  
297 for their GAP activity, consistent with its role as the catalytic residue (East et al., 2012). Even  
298 relatively small changes at this position, such as conversion to Lys, resulted in the complete loss  
299 of GAP activity.

300 Although plant ELMODs have only limited similarity to mammalian proteins (e.g. the  
301 Arabidopsis and human ELMODs have ~20% sequence identity), they contain the same  
302 conserved region and invariant Arg residue (Figure 6F). To test if this region is essential for  
303 function in MCR and ELMOD\_A, we created constructs in which the invariant Arg (R127) was  
304 substituted with Lys (*MCRpr:gMCR<sup>R127K</sup>-YFP* and *EApr:gELMOD\_A<sup>R127K</sup>-YFP*). These  
305 constructs were then expressed, respectively, in the *mcr* and *mcr elmod\_a* mutants. Unlike the  
306 constructs with the wild-type MCR and ELMOD\_A, the R127K constructs, although expressed  
307 normally, completely failed to restore the expected aperture patterns (0/8 T<sub>1</sub> plants for  
308 MCR<sup>R127K</sup>; 0/12 T<sub>1</sub> plants for ELMOD\_A<sup>R127K</sup>), indicating that, like in mammalian ELMODs,  
309 the Arg in the putative GAP region is critical for the activity of MCR and ELMOD\_A (Figure  
310 6B–6C).

### 311 **The number of developing aperture domains is highly sensitive to the levels of MCR and** 312 **ELMOD\_A**

313 While working with *MCR-YFP* and *ELMOD\_A-YFP* transgenic lines, we made a surprising  
314 discovery. We noticed that while most of these lines had apertures restored to the expected  
315 number (i.e. three apertures for *mcr MCRpr:gMCR-YFP* and a ring-shaped aperture/two  
316 apertures for *mcr elmod\_a EApr:ELMOD\_A-YFP*), in some transgenic T<sub>1</sub> lines the number of  
317 apertures exceeded the expectations: with up to six apertures forming in *mcr MCRpr:gMCR-YFP*  
318 and up to four apertures in *mcr elmod\_a EApr:gELMOD\_A-YFP* (Figure 7A–7B’).

319 To test if different aperture numbers could be due to different levels of transgene expression, we  
320 examined YFP fluorescence in homozygous lines producing different aperture numbers. For both  
321 *MCR* and *ELMOD\_A* transgenes, the number of apertures positively correlated with the level of  
322 YFP signal in the microspore cytoplasm and nucleoplasm (Figure 7C–7E, Figure 7—figure

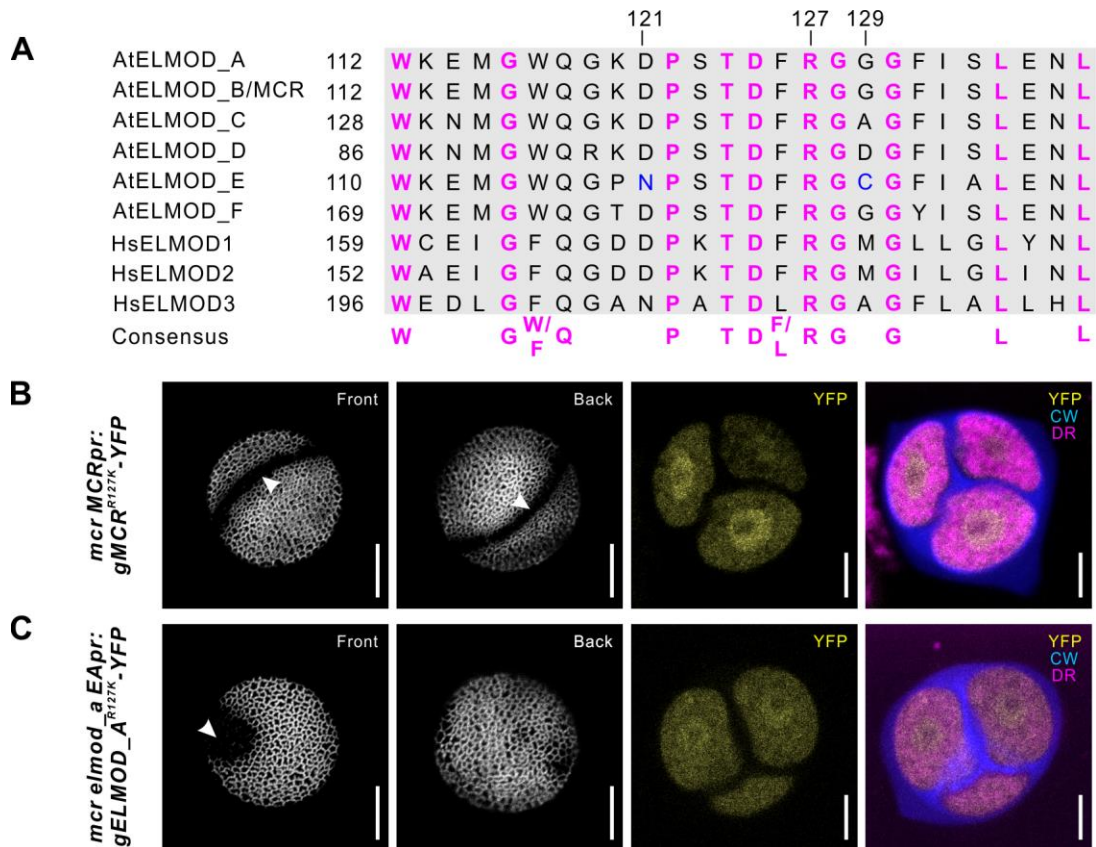

323

324 **Figure 6.** The R127 residue of MCR and ELMOD\_A are essential for aperture formation. (A) Sequence alignment  
 325 of the conserved GAP regions from six Arabidopsis (At) and three human (Hs) ELMOD proteins, along with the  
 326 consensus sequence. Invariant Arg residue (R127) and two other important residues (121 and 129) are indicated.  
 327 N121 and C129, essential for AtELMOD\_E function, are shown in blue. (B–C) Confocal images of pollen grains  
 328 and tetrads from *mcr* and *mcr elmod\_a* expressing, respectively, *MCRpr:MCR<sup>R127K</sup>-YFP* (B) and  
 329 *EApr:ELMOD\_A<sup>R127K</sup>-YFP* (C). Apertures are indicated with arrowheads. Scale bars, 10 μm for pollen and 5 μm for  
 330 tetrads.

331

332 supplement 1A). In addition, in some lines, the number of apertures further increased in T<sub>2</sub> or T<sub>3</sub>  
 333 generations compared to the numbers in T<sub>1</sub>, consistent with the transgene dosage increasing in  
 334 later generations due to attaining homozygosity.

335 To further test the notion that aperture number depends on the *MCR/ELMOD\_A* gene  
 336 dosage/levels of expression, we modulated the dosage of *MCR*, starting with a defined transgene.  
 337 We crossed a homozygous *mcr MCRpr:gMCR-YFP* plant from line 7-2, commonly producing >6  
 338 apertures (Figure 7C), with (1) *mcr* and (2) wild type. In the resulting transgenic F<sub>1</sub> progeny of  
 339 the first cross, *MCR* should be expressed from one source – a single copy of the transgene. In the

340 F<sub>1</sub> progeny of the second cross it should be expressed from two sources – one copy of the  
341 transgene plus one of the endogenous gene. In the pollen of these F<sub>1</sub> plants, the number of  
342 apertures correlated with the number of functional copies of *MCR*: pollen of *gMCR-YFP/-*  
343 *mcr/mcr* produced on average  $4.68 \pm 1.08$  apertures compared to  $5.85 \pm 1.52$  apertures in *gMCR-*  
344 *YFP/- mcr/+* (Figure 7F, Figure 7—figure supplement 1B). We further assessed aperture  
345 phenotypes in the progeny of these plants that had a homozygous transgene and either zero or  
346 two copies of endogenous *MCR*. Both genotypes with the homozygous transgene produced many  
347 more apertures compared to plants with the hemizygous transgene, but they also differed  
348 significantly from each other, with the number of apertures correlating with the presence of  
349 endogenous *MCR* ( $8.08 \pm 1.57$  in *MCR-YFP/MCR-YFP mcr/mcr* vs.  $9.34 \pm 1.50$  in *MCR-*  
350 *YFP/MCR-YFP +/+*) (Figure 7F, Figure 7—figure supplement 1B). These results indicate that  
351 the process of aperture domain specification is highly sensitive to the levels of *MCR* and  
352 *ELMOD\_A* in developing microspores.

### 353 **The ELMOD family in angiosperms has four distinct protein clades, with most species** 354 **containing two A/B type proteins**

355 To examine the evolutionary history of the plant ELMOD family, we retrieved 561 ELMOD  
356 sequences belonging to 178 species across the plant kingdom and used them for a detailed  
357 phylogenetic analysis. ELMOD proteins are widespread in plants, suggesting that they perform  
358 important functions (Figure 8A).

359 Green algae as well as non-vascular land plants (liverworts, mosses, and hornworts) typically  
360 have a single ELMOD protein, but an ancestor of lycophytes and ferns had a gene duplication  
361 (Figure 8A–8B). Beginning with gymnosperms, the ELMOD family expanded and diversified,  
362 with distinct protein groups clustering with the A/B/C clade, the E clade, and the F clade  
363 (*Arabidopsis* proteins were used as landmarks in naming the clades). In early angiosperms,  
364 ELMOD proteins separated into four well-supported clades: A/B, C, E, and F (Figure 8A, 8B,  
365 Figure 8—figure supplement 1). The split within the aperture factor-containing A/B clade into  
366 the separate ELMOD\_A and ELMOD\_B (*MCR*) lineages happened late – in the common  
367 ancestor of the Brassicaceae family (Figure 8A, Figure 8—figure supplement 1). Yet, in many  
368 other angiosperm species, including magnoliids, monocots, basal eudicots, and multiple asterids

369 and rosids, the A/B clade also contains at least two proteins (Figure 8—figure supplement 1).  
370 This shows that

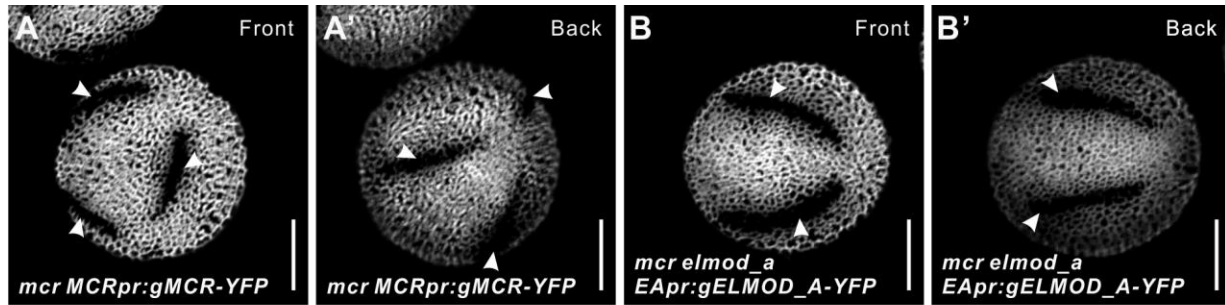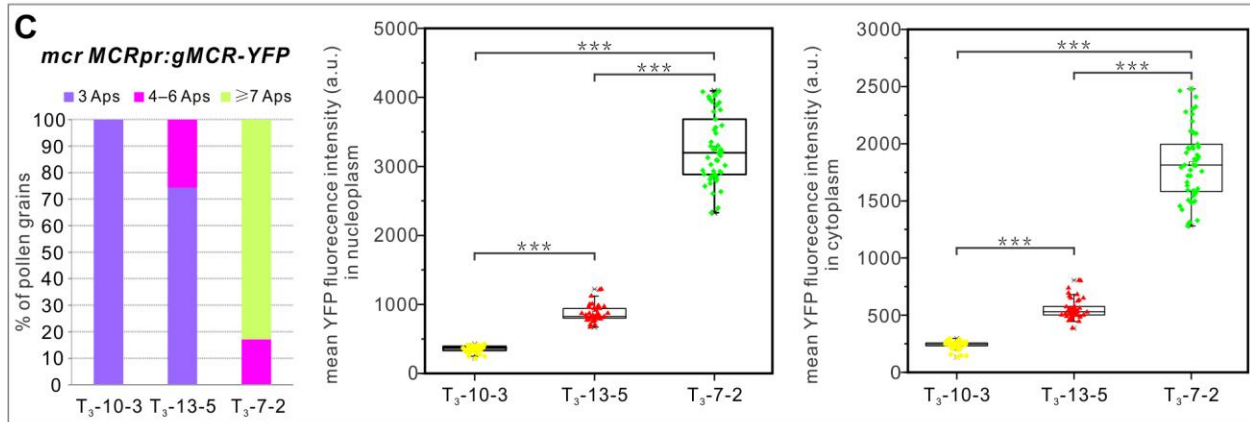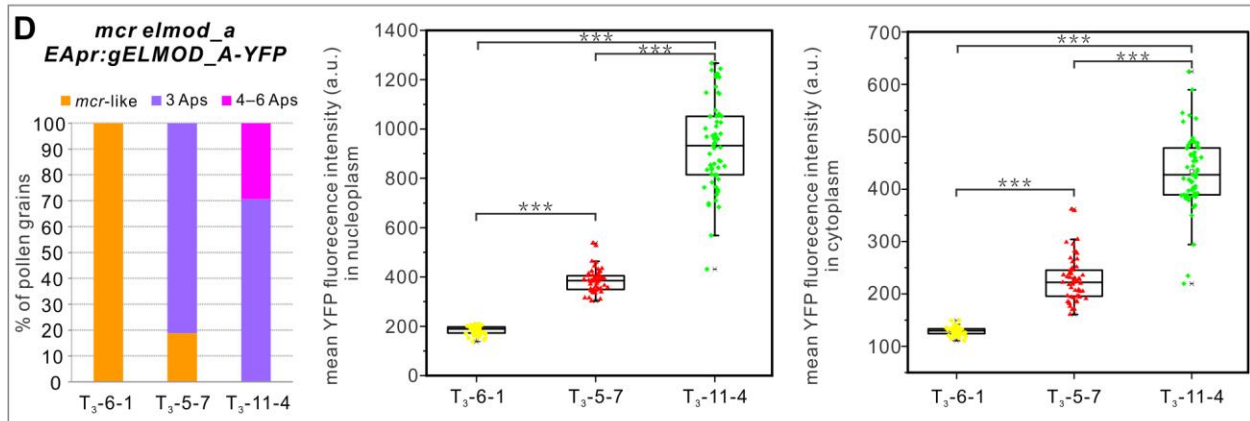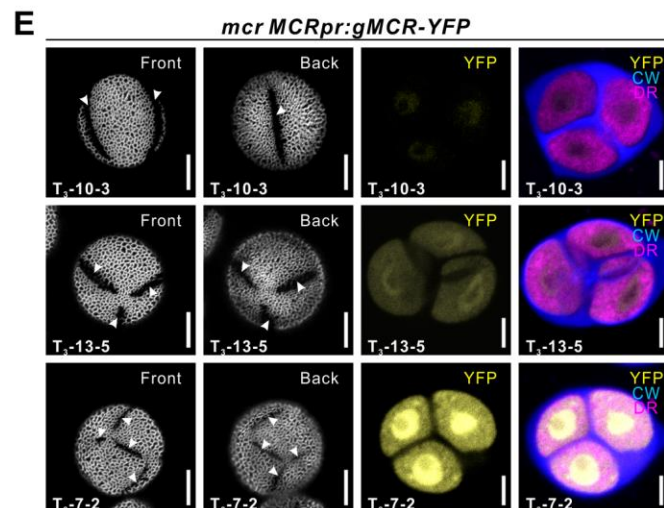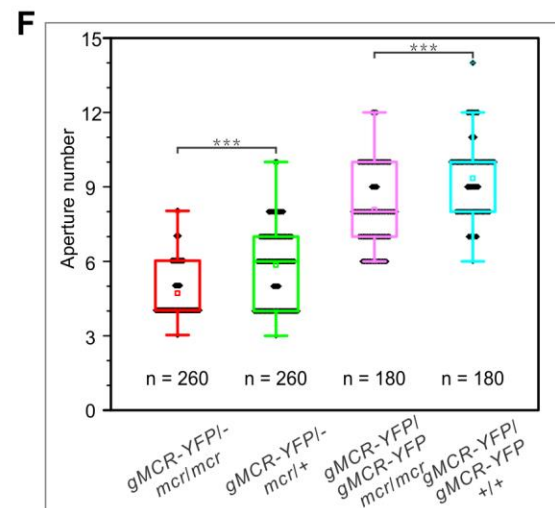



372 **Figure 7.** Aperture number is highly sensitive to the levels of MCR and ELMOD\_A. (A–B') Pollen grains from the  
373 *mcr MCRpr:gMCR-YFP* and *mcr elmod\_a EApr:gELMOD\_A-YFP* transgenic lines, respectively, with six and four  
374 apertures. (C–D) Quantification of aperture number and mean YFP signal in three homozygous lines of *mcr*  
375 *MCRpr:gMCR-YFP* (C) and *mcr elmod\_a EApr:gELMOD\_A-YFP* (D). Stacked bars show the percentage of pollen  
376 grains (from  $\geq 3$  individual plants) with indicated number of apertures. Boxplots show mean YFP signal in the  
377 microspore nucleoplasm and cytoplasm. a. u., arbitrary units. (E) Representative images of pollen grains and tetrads  
378 corresponding to data in (C). (F) Boxplots showing aperture number depends on the number of functional copies of  
379 *MCR*. Number of analyzed pollen grains (from  $\geq 3$  individual plants) is indicated. For all boxplots, boxes represent  
380 the first and third quartiles, central lines depict the median, small squares in the boxes indicate the mean values, and  
381 small shapes show individual samples. Whiskers extend to minimum and maximum values. \*\*\* $p < 0.001$  (two-tailed  
382 Student's t-test). Apertures are indicated with arrowheads. Scale bars, 10  $\mu\text{m}$  for pollen and 5  $\mu\text{m}$  for tetrads.  
383

384 independent duplications in this lineage happened multiple times, suggesting the existence of  
385 strong evolutionary pressure to maintain more than one gene of the A/B type.

### 386 **Phylogenetic analysis of the ELMOD family reveals the importance of positions 165 and** 387 **129 and suggests ELMOD\_D is likely a pseudogene**

388 The extensive number of the retrieved ELMOD sequences allowed us to evaluate conservation of  
389 the residues disrupted in MCR by the *mcr-1* and *mcr-2* mutations. Pro165, converted into Ser in  
390 *mcr-1* (Figure 3A, Figure 3—figure supplement 1), was present in each of the 553 ELMOD  
391 sequences containing this region, suggesting a critical role in protein function. This Pro belongs  
392 to the highly conserved WEYPFVAVAG motif (Figure 3—figure supplement 1) found in all six  
393 Arabidopsis ELMODs, as well as in the majority of ELMODs from other plants, including green  
394 algae.

395 The conversion of Gly129 into Asp in *mcr-2* (Figure 3A, Figure 3—figure supplement 1) also  
396 represents a very unusual change. Gly129 lies within the putative GAP region, neighboring the  
397 critical catalytic Arg127. Notably, except for one likely pseudogene (see below), none of the  
398 other 560 retrieved ELMOD sequences has an Asp at that site.



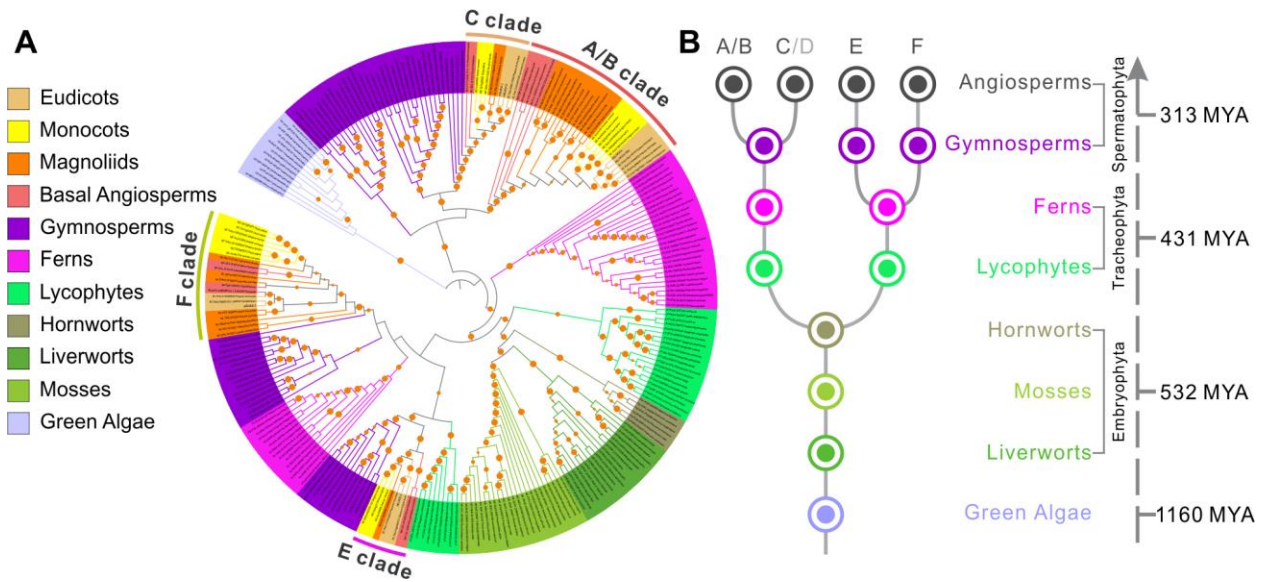

399

400 **Figure 8.** ELMOD proteins exist across the plant kingdom. (A) Maximum likelihood phylogenetic tree of ELMOD  
 401 proteins across the plant kingdom. The four clades of angiosperm ELMODs are indicated. Orange circles: bootstrap  
 402 values of 70–100%. (B) Inferred evolutionary history of the *ELMOD* gene family. Dots, inferred ancestral gene  
 403 number in different plant groups; letters on top, ELMOD clades named after the corresponding Arabidopsis  
 404 proteins; gray D indicates Arabidopsis *ELMOD\_D* is likely a pseudogene; numbers on the right, estimated time of  
 405 divergence in millions of years (MYA) calculated using the TimeTree database.

406

407 Our careful analysis of residues occupying position 129 in the GAP region across the angiosperm  
 408 ELMOD proteins led to an interesting discovery. In the 365 analyzed angiosperm sequences, this  
 409 site is occupied by only three amino acids: Cys, Gly, or Ala. (Earlier diverged plants have Ala or  
 410 Gly at this site.) Strikingly, we found that all proteins with Cys129 cluster with the E clade,  
 411 whereas nearly all proteins with Gly129 cluster with either the A/B or the F clades, and nearly all  
 412 proteins with Ala129 cluster with the C clade. (Only six exceptions were found among the 365  
 413 sequences: in five cases, proteins containing Ala129 clustered with the A/B or the F clades, and  
 414 in one case, a protein with Gly129 clustered with the C clade.) This suggested the intriguing  
 415 possibility, tested later, that, in angiosperms, residues at position 129 are important for functional  
 416 differentiation of the ELMOD proteins.

417 Besides *mcr-2*, the only protein with Asp at position 129 is the Arabidopsis *ELMOD\_D*.  
 418 However, it has several other features that suggest it is likely a pseudogene. At 213 amino acids,  
 419 *ELMOD\_D* is markedly shorter than the other five Arabidopsis ELMODs (265 to 323 aa-long):

420 it misses stretches of 52 aa upstream of the GAP region, four aa in the vicinity of the GAP  
421 region, and 22 aa at the very C-terminus of the protein (Figure 3—figure supplement 1). It also  
422 has major substitutions unique to this protein within or near its GAP region, which change the  
423 conserved Gly119 and Leu138 residues into Arg (the numbering within the GAP region is based  
424 on the MCR and ELMOD\_A sequences) (Figure 3—figure supplement 1). ELMOD\_D clusters  
425 with the C clade and is most closely related to the Arabidopsis ELMOD\_C, indicating it is a  
426 product of a very recent duplication (Figure 8—figure supplement 1). While some plants have  
427 more than one protein in the C clade, most others, including close relatives of Arabidopsis, have  
428 just a single C protein (Figure 8—figure supplement 1), suggesting that a single C-type activity  
429 is sufficient for most species. These findings, combined with the extremely low levels of  
430 *ELMOD\_D* expression in all tissues (Figure 3E), support the hypothesis that this member of the  
431 Arabidopsis ELMOD family is likely non-functional.

#### 432 **ELMOD\_E can influence aperture formation and produce a novel aperture pattern**

433 To test if other ELMOD family members, besides MCR and ELMOD\_A, might be involved in  
434 the aperture formation, we first examined the phenotypes of *elmod\_c*, *elmod\_d*, *elmod\_e* and  
435 *elmod\_f* single mutants carrying T-DNA insertions in their CDS (Figure 9—figure supplement  
436 1A). All mutants displayed normal aperture patterns (Figure 9—figure supplement 1B–1E’). For  
437 *ELMOD\_E*, we also created a mutant allele by CRISPR/Cas9, generating an early frame shift  
438 (Figure 9—figure supplement 1A), which also produced three normal apertures (Figure 9—  
439 figure supplement 1F–1F’). Additionally, we combined mutations in these four genes with *mcr*,  
440 creating a series of double mutants, which exhibited *mcr* phenotypes (Figure 9—figure  
441 supplement 1G–J’), indicating that, unlike *ELMOD\_A*, the other four *ELMOD* genes do not  
442 interact synergistically with *MCR* in aperture formation.

443 We also assessed the ability of these four genes to rescue the *mcr* aperture phenotype by  
444 expressing them from the *MCR* regulatory regions. The expression of the *ELMOD\_D* and  
445 *ELMOD\_F* did not produce changes in the aperture pattern (6/6 and 22/22 T<sub>1</sub> plants) (Figure 9—  
446 figure supplement 2A–2B’). As all the transgenes contained YFP, we monitored their expression.  
447 While the ELMOD\_F-YFP was expressed at a level comparable with that of the MCR-YFP and  
448 ELMOD\_A-YFP transgenes, ELMOD\_D-YFP was expressed at a very low level (Figure 9—  
449 figure supplement 2C–2D’), consistent with the hypothesis that *ELMOD\_D* is a pseudogene.

450 Since the *ELMOD\_D* transgene was expressed from the *MCR* regulatory regions, its expression  
451 might be regulated at the post-transcriptional level. Unlike *ELMOD\_D* and *ELMOD\_F*,  
452 *ELMOD\_C* had some ability, albeit limited, to restore three apertures in *mcr* (Figure 9—figure  
453 supplement 2E–2H’).

454 Most interestingly, the expression of *ELMOD\_E* in *mcr* led to a neomorphic phenotype: instead  
455 of narrow longitudinal furrows, pollen of all seven T<sub>1</sub> plants developed multiple short, round  
456 apertures (Figure 9A–9A’). To see if this effect was limited to the *mcr* background, we  
457 transformed the *MCRpr:ELMOD\_E-YFP* construct into wild-type Col-0 plants. The T<sub>1</sub> plants  
458 showed a range of aperture phenotypes (Figure 9B–9D’), yet multiple round apertures were  
459 commonly present, suggesting that *ELMOD\_E* exerts a dominant negative effect when  
460 misexpressed in developing microspores.

461 We then tested whether *ELMOD\_E* would have the same effect on aperture patterns when  
462 expressed from its own promoter. However, none of the 12 T<sub>1</sub> transgenic *mcr* plants expressing  
463 the *ELMOD\_Epr:ELMOD\_E-YFP* construct had any changes in the *mcr* aperture phenotype  
464 (Figure 9E–9E’). Analysis of the YFP signal showed that this gene is expressed in tetrad-stage  
465 microspores at much lower levels from its own promoter than from the *MCR* promoter (Figure  
466 9F–9H’). Thus, while *ELMOD\_E* can influence aperture patterns, it is likely not normally  
467 involved in this process in *Arabidopsis*.

468 To test if differences in the *MCR* levels could impact the ability of transgenic *ELMOD\_E* to  
469 produce round apertures, we crossed a *mcr MCRpr:gELMOD\_E-YFP* line with the above  
470 described *mcr MCRpr:gMCR-YFP* lines 10-3, 13-5, and 7-2 that express *MCR*, respectively, at  
471 low, medium, and high levels (Figure 7C). In the F<sub>1</sub> progeny of crosses with lines 10-3 and 13-5,  
472 pollen still produced round apertures (Figure 9I–9J’). Yet, in the F<sub>1</sub> progeny of the cross with  
473 line 7-2 expressing *MCR* at high level, furrow aperture morphology was restored (Figure 9K–  
474 9K’), suggesting that high level of *MCR* can counteract the neomorphic activity of *ELMOD\_E*.  
475 The number of furrows produced by the F<sub>1</sub> progeny of that cross was lower than in the F<sub>1</sub>  
476 progeny of the cross between line 7-2 and *mcr*, which had the same *MCR* dosage but lacked the  
477 *ELMOD\_E*

478

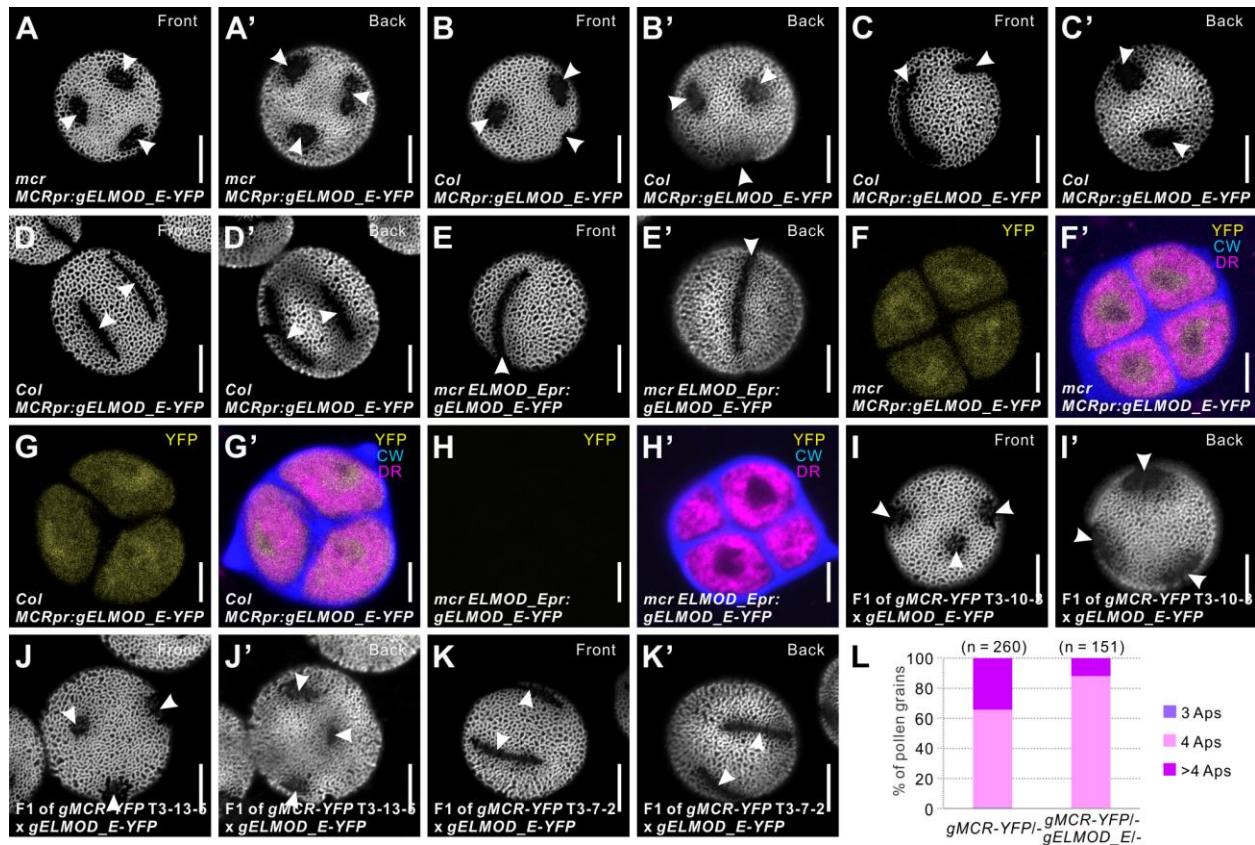

479

480 **Figure 9.** Arabidopsis ELMOD\_E can affect aperture patterns. (A–D') Pollen grains from *mcr* (A–A') and Col-0  
481 (B–D') plants expressing *MCRpr:gELMOD\_E-YFP*. (E–E') Pollen grain from *mcr* plants expressing  
482 *ELMOD\_Epr:gELMOD\_E-YFP*. (F–H') Confocal images of tetrads expressing *MCRpr:gELMOD\_E-YFP* and  
483 *ELMOD\_Epr:gELMOD\_E-YFP*. Adjacent panels show YFP signal ( $\alpha$ ) and merged signal ( $\alpha'$ ) from YFP, Calcofluor  
484 White (CW), and CellMask Deep Red (DR). (I–K') Pollen grains from the F<sub>1</sub> plants produced by crossing *mcr*  
485 *MCRpr:gELMOD\_E-YFP* with three T<sub>3</sub> lines of *mcr MCRpr:gMCR-YFP* (with single homozygous insertions of the  
486 *MCR-YFP* transgene, expressed, respectively, at low, medium, and high levels). (L) Percentage of pollen grains with  
487 indicated number of apertures in the pollen populations from F<sub>1</sub> progeny of the *mcr MCRpr:gMCR-YFP* T<sub>3</sub>-7-2 line  
488 crossed with *mcr* or with *mcr MCRpr:gELMOD\_E-YFP*. Number of analyzed pollen grains (from at least two  
489 individual plants) is indicated. Apertures are indicated with arrowheads. Scale bars, 10  $\mu$ m for pollen and 5  $\mu$ m for  
490 tetrads.

491

492 transgene (Figure 9L). These data support the idea that MCR and ELMOD\_E likely compete for  
493 the same interactors.

494 **Residues 121 and 129 in the GAP region are important for the MCR- and ELMOD\_E-**  
495 **specific functions in aperture formation**



496 The different aperture phenotypes of *mcr MCRpr:gMCR-YFP* and *mcr MCRpr:gELMOD\_E-*  
497 *YFP* lines gave us an opportunity to test the hypothesis that residues at position 129 are  
498 important for functional differentiation of ELMODs from different clades. For E-clade proteins,  
499 we also noticed that Cys129 was always found together with Asn121. These residues are unique  
500 to this clade: 100% of the E-clade sequences (n=69) have Asn121/Cys129 vs. 0% of sequences  
501 from the other clades (n=297). Thus, this combination could be important for the E-clade  
502 functions. In the other three clades, position 121 is always occupied by Asp.

503 To investigate the importance of sites 121 and 129 for MCR and ELMOD\_E functions, we  
504 created six constructs in which one or both residues at these positions were replaced with the  
505 residues typical of the other clade and expressed them in the *mcr* mutant. The MCR proteins  
506 carrying the E-specific residues at both positions ( $MCR^{D121N/G129C}$ ) or at the position 121  
507 ( $MCR^{D121N}$ ) still retained most of the MCR function, with most T<sub>1</sub> plants producing three or  
508 more furrow apertures in most of their pollen grains (7/9 and 12/12 T<sub>1</sub> plants, respectively)  
509 (Figure 10A, 10B, Figure 10—figure supplement 1A). However, when the E-specific residue  
510 was present only at position 129 ( $MCR^{G129C}$ ), MCR protein became less active, with only 5 out  
511 of 11 T<sub>1</sub> plants producing three furrow apertures in all or most of their pollen (Figure 10C). In  
512 the rest of these T<sub>1</sub> plants, the *mcr* phenotype was not rescued or was rescued poorly, with <30%  
513 of pollen grains forming three apertures.

514 Experiments with the ELMOD\_E proteins carrying the MCR residues at positions 121 and 129  
515 confirmed the importance of Asn121 and Cys129 for the ELMOD\_E neomorphic activity. In the  
516 case where both residues were replaced with the MCR residues ( $ELMOD\_E^{N121D/C129G}$ ),  
517 ELMOD\_E largely lost its ability to create round apertures and instead often restored three  
518 furrow-like apertures, thus acting like MCR (Figure 10D, Figure 10—figure supplement 1B). In  
519 the cases when only one residue was changed ( $ELMOD\_E^{N121D}$  and  $ELMOD\_E^{C129G}$ ), the mutant  
520 ELMOD\_E proteins were still often able to produce multiple round apertures, although three  
521 normal furrows or a mixture of furrows and round apertures were also produced, suggesting that  
522 the single mutations reduced the ELMOD\_E activity, but not eliminated it entirely (Figure 10E,  
523 10F, Figure 10—figure supplement 1B).

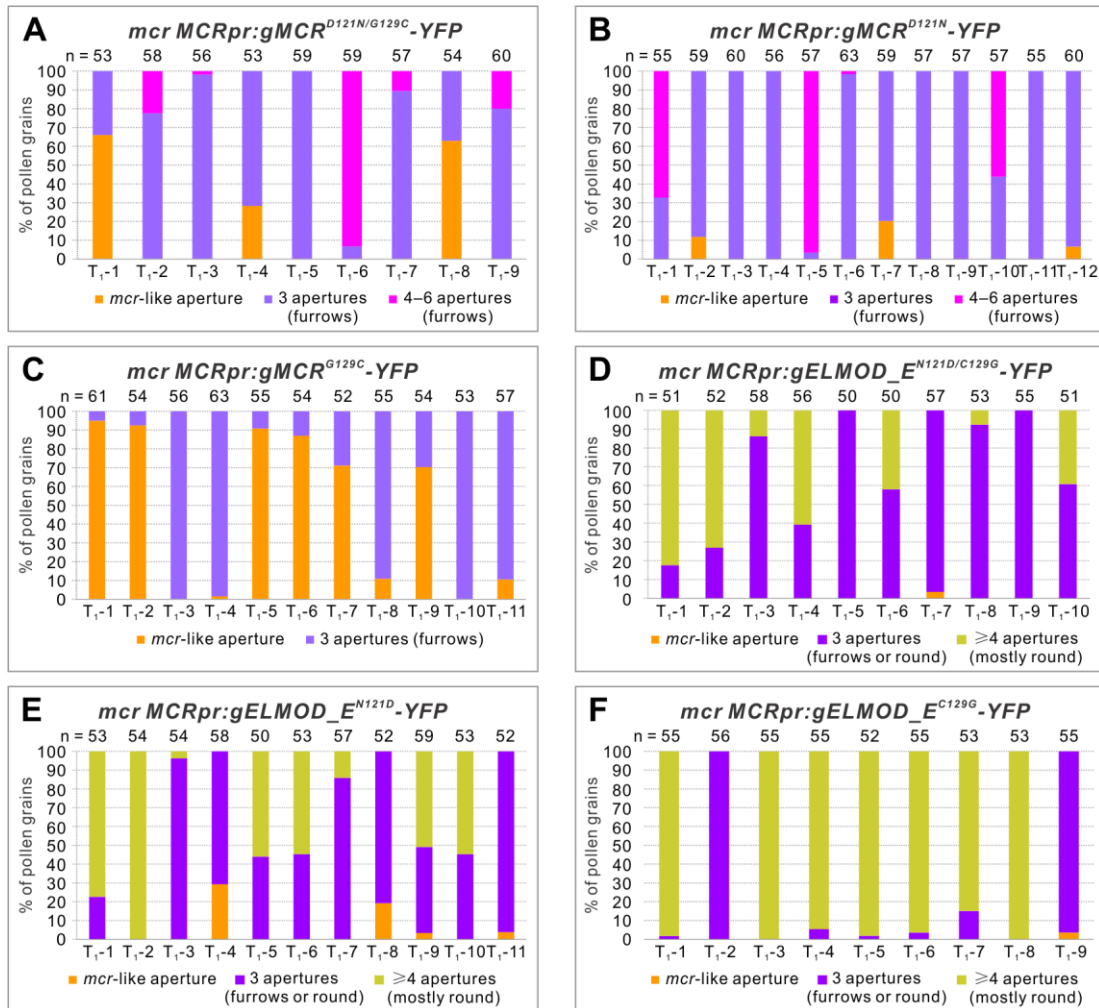

524

525 **Figure 10.** Residues 121 and 129 in the GAP region are important for MCR- and ELMOD\_E-specific functions in  
 526 aperture formation. Percentage of pollen grains with indicated number of apertures in the pollen populations from  
 527 independent T<sub>1</sub> *mcr* plants expressing variants of *MCRpr:gMCR-YFP* (A–C) or *MCRpr:ELMOD\_A-YFP* (D–F)  
 528 with residues 121 and/or 129 mutated. Number of analyzed pollen grains is indicated above the bars.

529

530 Taken together, these results show that residues at positions 121 and 129 in the GAP region  
 531 provide important contributions to the specific function of each protein. Yet they are less critical  
 532 for MCR, in accord with the fact that Asp121 and Gly129 are not unique to the A/B clade. In the  
 533 case of ELMOD\_E, the E-clade-specific combination of Asn121/Cys129 appears to be essential  
 534 for its distinct activity. When both residues undergo MCR-like changes, ELMOD\_E loses its  
 535 neomorphic activity, instead becoming capable of carrying out the MCR role in aperture  
 536 formation.



## 537 **Discussion**

538 How developing pollen grains create beautiful and diverse geometrical aperture patterns has been  
539 a long-standing problem in plant biology (Fischer, 1889; Ressayre et al., 2002; Wodehouse,  
540 1935). In this study, we uncovered the first set of molecular factors, belonging to the ELMOD  
541 protein family, that have a clear ability to regulate the number, positions, and morphology of  
542 aperture domains. MCR and its close paralog ELMOD\_A act as (somewhat) redundant positive  
543 regulators of furrow aperture formation in Arabidopsis.

544 Our genetic analysis places MCR and ELMOD\_A at the beginning of the aperture formation  
545 pathway, upstream of the previously discovered aperture factors D6PKL3, INP1, and, likely,  
546 INP2, the recently identified partner of INP1. Previous studies showed that INP1 and INP2 act as  
547 the executors of the aperture formation program, absolutely essential for aperture development  
548 but not able on their own to influence the number and positions of aperture domains (Dobritsa et  
549 al., 2018; Lee et al., 2021; Li et al., 2018; Reeder et al., 2016). D6PKL3 was proposed to act  
550 upstream of INP1, defining the features of aperture domains, yet it also largely lacks the ability  
551 to initiate completely new domains (Lee et al., 2018; Zhou and Dobritsa, 2019). In *mcr*  
552 microspores, D6PKL3 and INP1 re-localize to the ring-shaped aperture domains (Figure 1G and  
553 2A), indicating that they become attracted to the newly specified aperture domains and the  
554 ELMOD proteins act as patterning factors, contributing to symmetry breaking and selection of  
555 sites for aperture domains.

556 Our data demonstrate that the aperture domains forming in each microspore are highly sensitive  
557 to the ELMOD\_A/MCR protein dosage (Figure 4C–4G', Figure 7, Figure 7—figure supplement  
558 1). Increased dosage leads to a higher number of apertures, while decreased dosage results in  
559 fewer. Thus, modulation of ELMOD protein levels offers a mechanism for creating different  
560 aperture patterns in different species. Interestingly, within the genus *Pedicularis*, some species  
561 display the *mcr*-like ring-shaped apertures, while others produce three apertures (Wang et al.,  
562 2009, 2017), which could be due to variations in ELMOD proteins or their effectors or  
563 regulators. Importantly, while great diversity of pollen aperture numbers is found across plant  
564 species, within a species, this trait tends to be very robust. For example, in wild-type  
565 Arabidopsis, the number of apertures rarely deviates from three (Reeder et al., 2016). Our  
566 results, therefore, imply that, usually, levels of MCR and ELMOD\_A are likely very tightly

567 controlled. Our transgenic constructs likely miss some regulatory elements controlling  
568 expression of these genes from the endogenous sites in the genome. Additionally, there might be  
569 other mechanisms to precisely regulate the activity of these *ELMOD* genes.

570 The discovery that *ELMOD\_E* can also influence aperture patterns in Arabidopsis and create  
571 multiple round apertures instead of three furrows (Figure 9A–9B') suggests that the regulation of  
572 *ELMOD\_E* might also contribute to the diversity of aperture patterns in nature. In Arabidopsis,  
573 *ELMOD\_E* does not seem to be usually involved in aperture formation. Yet, when misexpressed  
574 from the *MCR* regulatory regions, it interferes with *MCR* and *ELMOD\_A* activity (Figure 9I–  
575 9L), resulting in the formation of new aperture domains.

576 *ELMODs* are ancient proteins, predicted to have been present in the last common ancestor of all  
577 eukaryotes (East et al., 2012). In animals, these proteins act as non-canonical GTPase activating  
578 proteins (GAPs), regulating activities of both Arf and Arl GTPases (Bowzard et al., 2007;  
579 Ivanova et al., 2014; Turn et al., 2020). Arf GTPases are commonly associated with the  
580 recruitment of vesicle coat proteins to different membrane compartments to initiate vesicle  
581 budding and trafficking, while the roles of the related Arl proteins are less understood and likely  
582 more diverse (Sztul et al., 2019). Although the function of *ELMOD* proteins in plants is  
583 unknown, their presence in green algae and other basal plants suggests that they have been  
584 playing important roles in plant cells since their inception. Our phylogenetic analysis indicates  
585 that this family in plants is monophyletic, and the genes have duplicated and diversified over the  
586 course of plant evolution.

587 The angiosperm *ELMOD* family has four distinct clades (Figure 8A, 8B, Figure 8—figure  
588 supplement 1). In many species, the A/B clade, containing *MCR* and *ELMOD\_A*, has two or  
589 more proteins, due to independent duplications that occurred multiple times in evolution. This  
590 suggests that species might be under a selective pressure to keep more than one A/B type protein,  
591 implying that the processes in which these proteins are involved (e.g. aperture formation) benefit  
592 from genetic redundancy and, thus, are highly important.

593 Further studies will be required to establish the biochemical role of plant *ELMOD* proteins. Like  
594 their animal counterparts, plant *ELMODs* may be involved in regulation of Arf/Arl activities.  
595 The protein region proposed to be the GAP region in mammalian *ELMODs* (East et al., 2012) is  
596 conserved in plant proteins, and the invariant Arg residue believed to be catalytic in mammalian

597 ELMODs is also necessary for function in MCR and ELMOD\_A (Figure 6B–6C). Interestingly,  
598 some positions within the conserved GAP region show strict residue specificity in different  
599 clades, suggesting they could be important for functional diversity of these proteins. Consistent  
600 with this, we found the combination of Asn121/Cys129 to be key for the ELMOD\_E neomorphic  
601 aperture-forming activity (Figure 10D–10F).

602 Arabidopsis has 19 ARFs and ARLs, and with few exceptions, most remain uncharacterized  
603 (Delgadillo et al., 2020; Gebbie et al., 2005; McElver et al., 2000; Singh et al., 2018; Vernoud et  
604 al., 2003; Xu and Scheres, 2005). The roles attributed to members of this family – e.g. in  
605 secretion, endocytosis, activation of phosphatidyl inositol kinases, and actin polymerization  
606 (Singh and Jürgens, 2018; Sztul et al., 2019) – are all potentially fitting with the formation of  
607 distinct aperture domains. If ELMODs are indeed the negative regulators of ARF/ARL GTPases,  
608 this would suggest that activity of these GTPases can inhibit formation of aperture domains and  
609 they have to be kept in check.

610 Alternatively, plant ELMODs could have evolved new functions. Interestingly, the only study  
611 done so far on an ELMOD protein in plants (Hoefle and Hückelhoven, 2014) pulled out the  
612 barley homolog of ELMOD\_C in a yeast two-hybrid screen as an interactor of a ROP GAP, a  
613 GAP for a different class of small GTPases, Rho-of-plants. Rho GTPases (including ROPs) are  
614 well-known regulators of cell polarity and domain formation (Feiguelman et al., 2018; Yang and  
615 Lavagi, 2012), so their involvement in aperture formation cannot be excluded.

616 In summary, we presented critical players in the process of patterning the pollen surface. These  
617 players belong to the ELMOD protein family, which, while undoubtedly important, has not yet  
618 been characterized in plants. Future studies should focus on identifying the interactors of the  
619 ELMOD proteins and on understanding the mechanisms through which they specify positions  
620 and shape of aperture domains without noticeably accumulating at these regions.

621

## 622 **Materials and methods**

### 623 **Key resources table**

| Reagent type<br>(species) or<br>resources | Designation | Source or reference | Identifiers | Additional<br>information |
|-------------------------------------------|-------------|---------------------|-------------|---------------------------|
|-------------------------------------------|-------------|---------------------|-------------|---------------------------|

|                                                            |                               |                                                                             |                                                                                                   |                                                         |
|------------------------------------------------------------|-------------------------------|-----------------------------------------------------------------------------|---------------------------------------------------------------------------------------------------|---------------------------------------------------------|
| Gene<br>( <i>Arabidopsis thaliana</i> )                    | <i>ELMOD_A</i>                | <a href="https://www.arabidopsis.org/g/">https://www.arabidopsis.org/g/</a> | <i>AT3G60260</i>                                                                                  | N/A                                                     |
| Gene<br>( <i>Arabidopsis thaliana</i> )                    | <i>MCR/ELMOD_B</i>            | <a href="https://www.arabidopsis.org/g/">https://www.arabidopsis.org/g/</a> | <i>AT2G44770</i>                                                                                  | N/A                                                     |
| Gene<br>( <i>Arabidopsis thaliana</i> )                    | <i>ELMOD_C</i>                | <a href="https://www.arabidopsis.org/g/">https://www.arabidopsis.org/g/</a> | <i>AT1G67400</i>                                                                                  | N/A                                                     |
| Gene<br>( <i>Arabidopsis thaliana</i> )                    | <i>ELMOD_D</i>                | <a href="https://www.arabidopsis.org/g/">https://www.arabidopsis.org/g/</a> | <i>AT3G43400</i>                                                                                  | N/A                                                     |
| Gene<br>( <i>Arabidopsis thaliana</i> )                    | <i>ELMOD_E</i>                | <a href="https://www.arabidopsis.org/g/">https://www.arabidopsis.org/g/</a> | <i>AT1G03620</i>                                                                                  | N/A                                                     |
| Gene<br>( <i>Arabidopsis thaliana</i> )                    | <i>ELMOD_F</i>                | <a href="https://www.arabidopsis.org/g/">https://www.arabidopsis.org/g/</a> | <i>AT3G03610</i>                                                                                  | N/A                                                     |
| Strain, background<br>( <i>Agrobacterium tumefaciens</i> ) | strain GV3101                 | Widely distributed                                                          | N/A                                                                                               | Competent cells                                         |
| Genetic reagent<br>( <i>Arabidopsis thaliana</i> )         | <i>mcr-1</i>                  | This study, EMS mutagenesis                                                 | N/A                                                                                               | See Supplementary file 1 for all other genetic reagents |
| Chemical compound, drug                                    | Auramine O                    | Thermo Fisher Scientific                                                    | A96825                                                                                            | N/A                                                     |
| Chemical compound, drug                                    | Vectashield antifade solution | Vector Labs                                                                 | H-1000-10                                                                                         | N/A                                                     |
| Chemical compound, drug                                    | Calcofluor White              | PhytoTechnology Laboratories                                                | C1933                                                                                             | N/A                                                     |
| Chemical compound, drug                                    | CellMask Deep Red             | Thermo Fisher Scientific                                                    | C10046                                                                                            | N/A                                                     |
| Software, algorithm                                        | NIS Elements v.4.20           | Nikon Microscopy                                                            | N/A                                                                                               | N/A                                                     |
| Software, algorithm                                        | MAFFT version 7               | (Katoh and Standley, 2013; Katoh et al., 2002)                              | <a href="https://mafft.cbrc.jp/alignment/software/">https://mafft.cbrc.jp/alignment/software/</a> | N/A                                                     |
| Software, algorithm                                        | TrimAl                        | (Capella-Gutiérrez et al., 2009)                                            | <a href="https://vicfero.github.io/trimal/">https://vicfero.github.io/trimal/</a>                 | N/A                                                     |
| Software, algorithm                                        | IQ-TREE                       | (Nguyen et al., 2015)                                                       | <a href="http://www.iqtree.org/">http://www.iqtree.org/</a>                                       | N/A                                                     |

---

|                        |                |         |           |                                                                   |     |
|------------------------|----------------|---------|-----------|-------------------------------------------------------------------|-----|
| Software,<br>algorithm | Origin<br>2018 | version | OriginLab | <a href="https://www.originlab.com">https://www.originlab.com</a> | N/A |
|------------------------|----------------|---------|-----------|-------------------------------------------------------------------|-----|

---

624

## 625 **Plant materials and growth conditions**

626 *Arabidopsis thaliana* genotypes used in this study were either in Columbia (Col) or Landsberg  
627 *erecta* (*Ler*) background. Pollen from wild-type Col-0 and *Ler* has indistinguishable aperture  
628 phenotypes. The following genotypes were also used: *mcr-1*, *mcr-2*, *mcr-3*, *mcr-4*, *mcr-5*  
629 (CS853233), *mcr-6* (SALK\_205528C), *mcr-7* (SALK\_203827C), *elmod\_c* (SALK\_076565),  
630 *elmod\_d* (SALK\_031512), *elmod\_e* (SALK\_082496), *elmod\_f* (SALK\_010379), *inp1-1*  
631 (Dobritsa and Coerper, 2012), *inp2-1* (Lee et al., 2021), *d6pkl3-2* (Lee et al., 2018), *inp1-1*  
632 *DMC1pr:INP1-YFP* (Dobritsa et al., 2018), *d6pkl3-2 D6PKL3pr:D6PKL3-YFP* (Lee et al.,  
633 2018), *tes* (SALK\_113909), *MiMe* (d’Erfurth et al., 2009), *cenh3-1 GFP-tailswap* (CS66982).  
634 *mcr-1* through *mcr-4* mutants were discovered in a forward genetic screen performed on an  
635 EMS-mutagenized *Ler* population (Plourde et al., 2019). *mcr-5* through *mcr-7* mutants and  
636 *elmod\_c* through *elmod\_f* mutants were ordered from the Arabidopsis Biological Resource  
637 Center (ABRC). Plants were grown at 20–22°C with the 16-hour light/8-hour dark cycle in  
638 growth chambers or in a greenhouse at the Biotechnology support facility at OSU.

639 To generate the 2n *mcr tes* plants, *mcr-1* mutant was crossed with heterozygous *tes*, double  
640 heterozygotes were recovered in F<sub>1</sub> by genotyping (primers listed in Supplementary file 1), and  
641 double homozygotes were identified in F<sub>2</sub> population. The generation of haploid *mcr MiMe*  
642 plants was similar to the procedure previously described (Reeder et al., 2016). In brief, *mcr-1*  
643 mutant was first crossed with plants that were triple heterozygotes for *atrec8-3*, *osd1-3*, and  
644 *atspo11-1-3* (*MiMe* heterozygotes), then the quadruple heterozygotes were identified among the  
645 F<sub>1</sub> progeny by genotyping and crossed as males with *cenh3-1 GFP-tailswap* homozygous plants  
646 that were used as haploidy inducers (Ravi and Chan, 2010). In F<sub>1</sub> progeny of this cross were  
647 identified by their distinctive morphology as described (Ravi and Chan, 2010; Reeder et al.,  
648 2016), and the triple 1n *MiMe* and quadruple 1n *mcr MiMe* mutants were identified by  
649 genotyping (primers listed in Supplementary file 1). Unlike other 1n genotypes generated by this  
650 cross, which were sterile, the 1n plants with *MiMe* mutations were fertile and produced 1n pollen  
651 via mitosis-like division and dyad formation.

## 652 **Mapping of the MCR locus**



653 *mcr-1* mutant with *Ler* background was crossed with Col-0, and individual F<sub>2</sub> plants were  
654 screened under a dissecting microscope for the presence of the distinctive angular mutant  
655 phenotype in their dry pollen. In total, 369 plants with mutant phenotype were selected, and their  
656 genomic DNA was isolated. To map the *MCR* locus, we first conducted bulked segregant  
657 analysis, followed by the map-based positional cloning (Lukowitz et al., 2000). The insertion-  
658 deletion (InDel) molecular markers were developed based on the combined information from the  
659 1001 Genomes Project database (1001 Genomes Consortium, 2016) and the Arabidopsis  
660 Mapping Platform (Hou et al., 2010). The *MCR* locus was mapped to a 77-kb region between  
661 markers 2-18.39 Mb (18,395,427 bp) and 2-18.47 Mb (18,472,092 bp) on chromosome 2.  
662 Molecular markers used for mapping are listed in Supplementary file 1. Out of the 25 genes  
663 located in this interval we sequenced 11 genes, prioritized based on their predicted expression  
664 patterns and gene ontology, and found that one of them, *At2g44770*, contained a missense  
665 mutation. Sequencing of the other three non-complementing EMS alleles identified in the  
666 forward genetic screen (*mcr-2* to *mcr-4*) also revealed presence of mutations in *At2g44770*.

#### 667 **Inactivation of *ELMOD\_A* and *ELMOD\_E* with CRISPR/Cas9**

668 Two guide RNAs against target sequences at the beginning of the *ELMOD\_A* and *ELMOD\_E*  
669 CDS were selected with the help of the CRISPR-PLANT platform  
670 (<https://www.genome.arizona.edu/crispr/>) (Xie et al., 2014) and individually cloned into the *BsaI*  
671 site of the pHEE401E vector (Wang et al., 2015) as described (Xing et al., 2014), using,  
672 respectively, two sets of complementary primers: *elmod\_a* sgRNA-F/R and *elmod\_e* sgRNA-F/R  
673 (Supplementary file 1). The resulting constructs were separately transformed into the  
674 *Agrobacterium tumefaciens* strain GV3101, and then used to transform Arabidopsis Col-0 plants  
675 or *mcr-1* mutants (the latter only with the anti-*ELMOD\_E* construct) using the floral-dip method  
676 (Clough and Bent, 1998). The T<sub>1</sub> transformants were selected on ½ strength MS plates  
677 supplemented with 1% (w/v) sucrose, 0.8% (w/v) agar, and 50 µg/mL hygromycin, their DNA  
678 was extracted, and the regions surrounding the target sequences were sequenced. For  
679 *ELMOD\_A*, five of 25 T<sub>1</sub> plants had homozygous, biallelic, or heterozygous mutations.  
680 Sequencing the progeny of these plants demonstrated that all homozygous/biallelic mutants  
681 developed frame shifts in the *ELMOD\_A* CDS after the codon 64 (by acquiring either a one-nt  
682 insertion three nucleotides before PAM or a one-nt deletion two nucleotides before PAM). An  
683 *elmod\_a* mutant with a single A insertion, as shown in Figure 4A, and still carrying

684 CRISPR/Cas9 transgene, was crossed with the *mcr-1* mutant to obtain the *mcr elmod\_a* double  
685 mutant. For *ELMOD\_E*, one out of 12 and one out of 20 T<sub>1</sub> plants had biallelic mutations,  
686 respectively, in Col-0 and *mcr-1* backgrounds. In T<sub>2</sub> generation, homozygous mutants with a  
687 frame shift in the CDS were identified: in *elmod\_e<sup>CR</sup>*, a 13-nt region located four nucleotides  
688 before PAM was deleted and replaced with a different 9-nt sequence; in *mcr elmod\_e<sup>CR</sup>*, a single  
689 A was inserted four nucleotides before PAM. These mutants were used to observe the aperture  
690 phenotypes.

### 691 **Generation of transgenic constructs and plant transformation**

692 A 3,076-bp fragment upstream of the start codon of *MCR* was used as the *MCR* promoter for all  
693 *MCRpr* constructs. To generate the *MCRpr:gMCR* construct, the promoter and the 2,868-bp  
694 genomic fragment from the *MCR* start codon to 798 bp downstream of the stop codon were  
695 separately amplified from Col-0 genomic DNA and cloned into *SacI/NcoI* sites in the pGR111  
696 binary vector (Dobritsa et al., 2010) through In-Fusion cloning (Takara). An *AgeI* site was  
697 introduced in front of the *MCR* start codon for ease of subsequent cloning. For *MCRpr:MCR*  
698 *CDS*, the genomic fragment was replaced with the *MCR* coding sequence, which was amplified  
699 from the *MCR* cDNA construct CD257409 obtained from ABRC. For *MCRpr:gMCR-YFP*  
700 construct, the genomic fragment of *MCR* was amplified without the stop codon and cloned  
701 upstream of *YFP* into the pGR111 binary vector (Dobritsa et al., 2010). Additionally, a 497-bp 3'  
702 UTR region from *MCR* was then cloned downstream of *YFP*. Since we achieved phenotypic  
703 rescue and observed strong YFP signal with this construct, we used this combination of  
704 regulatory elements in all subsequent constructs for which we wanted to achieve the *MCR*-like  
705 expression. The constructs *MCRpr:gELMOD\_A/C/D/E/F-YFP* were created in a similar way.

706 For all *EApr* constructs, a 2,163-bp fragment upstream of the start codon of *ELMOD\_A* was  
707 amplified from Col-0 genomic DNA and used as the *ELMOD\_A* promoter. For  
708 *EApr:gELMOD\_A*, a 2,833-bp fragment, which included a 296-bp region downstream of the stop  
709 codon, was subcloned into pGR111 downstream of *EApr*. A *BamHI* site was introduced in front  
710 of the start codon for ease of subsequent cloning. For *EApr:gELMOD\_A-YFP*, a 2,534-bp  
711 genomic fragment (from the *ELMOD\_A* start codon to immediately upstream of the stop codon)  
712 was cloned between the *EApr* and *YFP*. For *ELMOD\_Epr:ELMOD\_E-YFP*, a 1,469-bp fragment  
713 upstream of the start codon of *ELMOD\_E* was amplified from Col-0 genomic DNA and used as  
714 the *ELMOD\_E* promoter to replace the *MCR* promoter in *MCRpr:gELMOD\_E-YFP*.

715 To generate the reporter constructs *MCRpr:H2B-RFP* and *EApr:H2B-RFP*, the *H2B-RFP* fusion  
716 gene was cloned into the *Bam*HI/*Spe*I sites downstream of the respective promoters in pGR111.  
717 To create constructs with single and double nucleotide substitutions, PCR-based site-directed  
718 mutagenesis was performed with IVA mutagenesis (García-Nafría et al., 2016) using *gMCR*-  
719 pGEM-T Easy, *gELMOD\_A*-pGEM-T Easy and *gELMOD\_E*-pGEM-T Easy as templates. The  
720 mutated sequences then replaced the respective wild-type sequences in *MCRpr:gMCR-YFP*-  
721 pGR111, *EApr:ELMOD\_A-YFP*-pGR111, and *MCRpr:gELMOD\_E-YFP*-pGR111. All primers  
722 used for creating constructs are listed in Supplementary file 1. All constructs were verified by  
723 sequencing and transformed by electroporation into the *Agrobacterium* strain GV3101 together  
724 with the helper plasmid pSoup. *Agrobacterium* cultures confirmed to contain the constructs of  
725 interest were then transformed into *mcr* or *mcr elmod\_a* by floral dip (*mcr elmod\_a* was verified  
726 to lack the anti-ELMOD\_A CRISPR/Cas9 transgene).

## 727 **Confocal microscopy and image analysis**

728 Preparation and imaging of mature pollen grains, MMC, tetrads, and free microspores were  
729 performed as previously described (Reeder et al., 2016). Imaging was done on a Nikon A1+  
730 confocal microscope with a 100× oil-immersion objective (NA = 1.4), using 1× confocal zoom  
731 for anthers, 3× zoom for pollen grains, 5× zoom for MMC and tetrads, and 5× or 8× zoom for  
732 free microspores. For imaging mature pollen grains, pollen was placed into a ~10-μL drop of  
733 auramine O working solution (0.001%; diluted in water from the 0.1% (w/v) stock prepared in  
734 50 mM Tris-HCl), allowed to hydrate for ~5 min, covered with a #1.5 cover slip, and sealed with  
735 nail polish. Exine was excited with a 488-nm laser and fluorescence was collected at 500-550  
736 nm. To count aperture number, images from the front and back view of pollen grain were taken.  
737 If some apertures were present on sides of a pollen grain not directly visible by focusing on the  
738 front and on the back, then z-stacks were taken (step size = 500 nm) and 3D images were  
739 reconstructed using NIS Elements software v.4.20 (Nikon) and used for counting aperture  
740 number.

741 For imaging cells of the developing pollen lineage, anthers were dissected out of stage-9 flower  
742 buds and placed into a small drop of Vectashield antifade solution supplemented with 0.02%  
743 Calcofluor White and 5 μg/mL membrane stain CellMask Deep Red. Cells in the pollen lineage  
744 were released by applying gentle pressure to the coverslip placed over the anthers. To obtain  
745 fluorescence signals, the following excitation/emission settings were used: RFP, 561 nm/580-

746 630nm; YFP, 514 nm/522-555 nm; Calcofluor White, 405 nm/424-475 nm; CellMask Deep Red,  
747 640 nm/663-738 nm. Z-stacks of tetrads were obtained with a step size of 500 nm and 3D  
748 reconstructed using NIS Elements v.4.20 (Nikon).

749 To compare the YFP fluorescence intensity in three different lines of *mcr MCRpr:gMCR-YFP* or  
750 *mcr elmod\_a EApr:gELMOD\_A-YFP*, tetrads were prepared simultaneously and imaged on the  
751 same day under identical acquisition settings on Nikon A1+ confocal microscope. The mean  
752 YFP signal intensities in nucleoplasm and cytoplasm of tetrads ( $n \geq 15$ ) were separately  
753 measured with the help of the ROI (Region of interest) statistics function in NIS Elements v.4.20  
754 (Nikon). For each tetrad, a single optical section showing both nucleoplasm and cytoplasm was  
755 selected and analyzed.

### 756 **Sequence retrieval and phylogenetic analysis of the plant ELMOD family**

757 ELMOD family members in Arabidopsis have the following accession numbers: *ELMOD\_A*,  
758 *At3g60260*; *MCR*, *At2g44770*; *ELMOD\_C*, *At1g67400*; *ELMOD\_D*, *At3g43400*; *ELMOD\_E*,  
759 *At1g03620*; *ELMOD\_F*, *At3g03610*. The phylogenetic tree of Arabidopsis ELMOD proteins in  
760 Figure 3E was built using the neighbor-joining (NJ) algorithm of MEGA X (Kumar et al., 2018),  
761 with bootstrap support calculated for 1,000 replicates.

762 Sequences of ELMOD proteins from species across the plant kingdom were retrieved from the  
763 Phytozome v.12 database (<https://phytozome.jgi.doe.gov/pz/portal.html>) and the 1,000 Plants  
764 (1KP) database (<https://db.cngb.org/onekp/>, last accessed in May 2020) (Wickett et al., 2014).  
765 MCR protein sequence was used as a query for an online BLASTP search of these databases  
766 with default parameters. The protein sequences with the E-value  $\leq 1e-10$ , sequence identity  
767  $\geq 30\%$ , and Bit-Score  $\geq 60$  were identified as ELMODs and further confirmed by a local BLASTP  
768 search using each of the other Arabidopsis ELMODs as a query. In the cases when two or more  
769 proteins were potentially translated from the same gene, the one providing the best match with  
770 the query was selected. In total, 561 ELMOD protein sequences from 178 representative species  
771 belonging to eudicots (36 species/195 sequences), monocots (14/94), magnoliids (20/64), basal  
772 angiosperms (5/13), gymnosperms (17/62), ferns (17/44), lycophytes (20/29), bryophytes (37/47;  
773 including 18 sequences from 15 liverworts, 6 sequences from 5 hornworts, and 23 sequences  
774 from 17 mosses)), and green algae (12/13) were retrieved and used for phylogenetic analysis.

775 Multiple sequence alignment was performed using MAFFT v7.017 (Katoh and Standley, 2013;  
776 Katoh et al., 2002) with the L-INS-i algorithm and default parameters. Sites with greater than

777 20% gaps were trimmed by TrimAl (Capella-Gutiérrez et al., 2009) and manually inspected for  
778 overhangs. ModelFinder (Kalyaanamoorthy et al., 2017) (accessed through IQ-TREE (Nguyen et  
779 al., 2015)) was run to find the best-fit amino acid substitution model. The alignment in Figure  
780 3—figure supplement 1 was visualized with Esript3.0 (Gouet et al., 1999). Phylogenetic trees  
781 were constructed using IQ-TREE with the Maximum Likelihood (ML) method, SH-aLRT test,  
782 and ultrafast bootstrap with 1,000 replicates. For the tree on Figure 8A, containing sequences  
783 from across the plant kingdom, 267 sequences were used, including all sequences retrieved from  
784 green algae, bryophytes, lycophytes, ferns, gymnosperms, and basal angiosperms, as well as 24  
785 sequences from magnoliids, 19 sequences from 3 monocots, and 16 sequences from 3 eudicots.  
786 For the tree on Figure 8—figure supplement 1, containing only angiosperm sequences, we used  
787 all 366 sequences retrieved for this group. Phylogenetic trees were visualized in iTOL v.5  
788 (Letunic and Bork, 2021) and can be accessed at <http://itol.embl.de/shared/Zhou3117>.

789

#### 790 **Expression pattern analysis of the Arabidopsis *ELMOD* genes**

791 RNA-seq data for different tissues/developmental stages of six Arabidopsis *ELMOD* genes were  
792 obtained from the TRAVA database (<http://travadb.org/>) (Klepikova et al., 2016). The ‘Raw  
793 Norm’ option was chosen for read counts, and default settings were used for all other options.  
794 The retrieved RNA-seq data were presented as a bubble heatmap using TBtools (Chen et al.,  
795 2020).

#### 796 **QUANTIFICATION AND STATISTICAL ANALYSIS**

797 Quantification of aperture numbers and YFP signal was done with NIS Elements v.4.20 software  
798 (Nikon). For each line, the aperture number of 160 pollen grains from at least three different  
799 plants were counted and the mean YFP fluorescence of at least 15 tetrads from the same plants  
800 was measured. Graphs were generated using Microsoft Excel or Origin version 2018 software.  
801 Binary comparisons were performed using a two-tailed Student’s t-test in Microsoft Excel;  
802 results with the  $p$  values below 0.05 were judged significantly different. The  $p$  values are  
803 represented as \*\*\* ( $p < 0.001$ ); \*\* ( $p < 0.01$ ); \* ( $p < 0.05$ ). All error bars represent standard  
804 deviation (SD). For all boxplots, the box defines the first and third quartile, the central line  
805 depicts the median, and the small square in the box represents the mean value. Whiskers extend  
806 to minimum and maximum values. Outliers are indicated as ×. Different shapes show individual



807 samples. Details of statistical analysis, number of quantified entities (n), and measures of  
808 dispersion can be found in the corresponding figure legends.

809

### 810 **Acknowledgements**

811 Funding for this project was provided by the US National Science Foundation (MCB-1817835)  
812 (awarded to A.A.D.). We also acknowledge the support of the OSU Mayers Undergraduate  
813 Summer Research Scholarship to P.A., the NSF-REU supplement funding to P.A. and A.H., and  
814 the iCAPS internship from the OSU Center for Applied Sciences to A.H.

815

### 816 **Author contributions**

817 Y.Z. and A.A.D. conceived and designed the experiments. Y.Z., P.A., S.H.R., B.H.L., A.H., and  
818 A.A.D. performed the experiments. Y.Z. and A.A.D. analyzed the data and wrote the manuscript.

819

### 820 **Declaration of interests**

821 The authors declare no competing interests.

822

### 823 **Additional files**

824 Supplementary files

- 825 • Supplementary file 1. Primers, molecular markers, and mutants/transgenic lines used in  
826 this study.

827

### 828 **Data availability**

829 The authors declare that all data supporting the findings of this study are included in the paper  
830 and the supplementary files.

831

### 832 **References**

833 1001 Genomes Consortium (2016). 1,135 genomes reveal the global pattern of polymorphism in  
834 *Arabidopsis thaliana*. *Cell* 166, 481–491.

- 835 Bowzard, J.B., Cheng, D., Peng, J., and Kahn, R.A. (2007). ELMOD2 is an Arl2 GTPase-  
836 activating protein that also acts on Arfs. *J. Biol. Chem.* 282, 17568–17580.
- 837 Capella-Gutiérrez, S., Silla-Martínez, J.M., and Gabaldón, T. (2009). trimAl: a tool for  
838 automated alignment trimming in large-scale phylogenetic analyses. *Bioinformatics* 25, 1972–  
839 1973.
- 840 Chen, C., Chen, H., Zhang, Y., Thomas, H.R., Frank, M.H., He, Y., and Xia, R. (2020). TBtools:  
841 An integrative toolkit developed for interactive analyses of big biological data. *Mol. Plant* 13,  
842 1194–1202.
- 843 Clough, S.J., and Bent, A.F. (1998). Floral dip: a simplified method for *Agrobacterium*-mediated  
844 transformation of *Arabidopsis thaliana*. *Plant J.* 16, 735–743.
- 845 Delgadillo, M.O., Ruano, G., Zouhar, J., Sauer, M., Shen, J., Lazarova, A., Sanmartín, M., Lai,  
846 L.T.F., Deng, C., Wang, P., et al. (2020). MTV proteins unveil ER- and microtubule-associated  
847 compartments in the plant vacuolar trafficking pathway. *Proc. Natl. Acad. Sci. U S A* 117, 9884–  
848 9895.
- 849 Dobritsa, A.A., and Coerper, D. (2012). The novel plant protein INAPERTURATE POLLEN1  
850 marks distinct cellular domains and controls formation of apertures in the *Arabidopsis* pollen  
851 exine. *Plant Cell* 24, 4452–4464.
- 852 Dobritsa, A.A., Lei, Z., Nishikawa, S., Urbanczyk-Wochniak, E., Huhman, D.V., Preuss, D., and  
853 Sumner, L.W. (2010). *LAP5* and *LAP6* encode anther-specific proteins with similarity to  
854 chalcone synthase essential for pollen exine development in *Arabidopsis thaliana*. *Plant Physiol.*  
855 153, 937–955.
- 856 Dobritsa, A.A., Kirkpatrick, A.B., Reeder, S.H., Li, P., and Owen, H.A. (2018). Pollen aperture  
857 factor INP1 acts late in aperture formation by excluding specific membrane domains from exine  
858 deposition. *Plant Physiol.* 176, 326–339.
- 859 East, M.P., Bowzard, J.B., Dacks, J.B., and Kahn, R.A. (2012). ELMO domains, evolutionary  
860 and functional characterization of a novel GTPase-activating Protein (GAP) domain for Arf  
861 protein family GTPases. *J. Biol. Chem.* 287, 39538–39553.
- 862 d’Erfurth, I., Jolivet, S., Froger, N., Catrice, O., Novatchkova, M., and Mercier, R. (2009).  
863 Turning meiosis into mitosis. *PLoS Biol.* 7, e1000124.
- 864 Feiguelman, G., Fu, Y., and Yalovsky, S. (2018). ROP GTPases structure-function and signaling  
865 pathways. *Plant Physiol.* 176, 57–79.
- 866 Fischer, H. (1889). *Beiträge zur vergleichenden Morphologie der Pollen-Körner* (Berlin).
- 867 Furness, C.A., and Rudall, P.J. (2004). Pollen aperture evolution – a crucial factor for eudicot  
868 success? *Trends Plant Sci.* 9, 154–158.

- 869 García-Nafría, J., Watson, J.F., and Greger, I.H. (2016). IVA cloning: A single-tube universal  
870 cloning system exploiting bacterial In Vivo Assembly. *Sci. Rep.* *6*, 1–12.
- 871 Gebbie, L.K., Burn, J.E., Hocart, C.H., and Williamson, R.E. (2005). Genes encoding ADP-  
872 ribosylation factors in *Arabidopsis thaliana* L. Heyn.; genome analysis and antisense  
873 suppression. *J. Exp. Bot.* *56*, 1079–1091.
- 874 Gouet, P., Courcelle, E., Stuart, D.I., and Métoz, F, F. (1999). ESPript: analysis of multiple  
875 sequence alignments in PostScript. *Bioinformatics* *15*, 305–308.
- 876 Hoefle, C., and Hückelhoven, R. (2014). A barley Engulfment and Motility domain containing  
877 protein modulates Rho GTPase activating protein HvMAGAP1 function in the barley powdery  
878 mildew interaction. *Plant Mol. Biol.* *84*, 469–478.
- 879 Hou, X., Li, L., Peng, Z., Wei, B., Tang, S., Ding, M., Liu, J., Zhang, F., Zhao, Y., Gu, H., et al.  
880 (2010). A platform of high-density INDEL/CAPS markers for map-based cloning in  
881 *Arabidopsis*. *Plant J.* *63*, 880–888.
- 882 Ivanova, A.A., East, M.P., Yi, S.L., and Kahn, R.A. (2014). Characterization of recombinant  
883 ELMOD (Cell Engulfment and Motility Domain) proteins as GTPase-activating proteins (GAPs)  
884 for ARF family GTPases. *J. Biol. Chem.* *289*, 11111–11121.
- 885 Kalyaanamoorthy, S., Minh, B.Q., Wong, T.K.F., von Haeseler, A., and Jermini, L.S. (2017).  
886 ModelFinder: fast model selection for accurate phylogenetic estimates. *Nature Methods* *14*, 587–  
887 589.
- 888 Katoh, K., and Standley, D.M. (2013). MAFFT Multiple Sequence Alignment Software Version  
889 7: improvements in performance and usability. *Mol. Biol. Evol.* *30*, 772–780.
- 890 Katoh, K., Misawa, K., Kuma, K., and Miyata, T. (2002). MAFFT: a novel method for rapid  
891 multiple sequence alignment based on fast Fourier transform. *Nucleic Acids Res.* *30*, 3059–3066.
- 892 Klepikova, A.V., Kasianov, A.S., Gerasimov, E.S., Logacheva, M.D., and Penin, A.A. (2016). A  
893 high resolution map of the *Arabidopsis thaliana* developmental transcriptome based on RNA-seq  
894 profiling. *Plant J.* *88*, 1058–1070.
- 895 Kumar, S., Stecher, G., Suleski, M., and Hedges, S.B. (2017). TimeTree: a resource for  
896 timelines, timetrees, and divergence times. *Mol. Biol. Evol.* *34*, 1812–1819.
- 897 Kumar, S., Stecher, G., Li, M., Knyaz, C., and Tamura, K. (2018). MEGA X: molecular  
898 evolutionary genetics analysis across computing platforms. *Mol. Biol. Evol.* *35*, 1547–1549.
- 899 Lee, B.H., Weber, Z.T., Zourelidou, M., Hofmeister, B.T., Schmitz, R., Schwechheimer, C., and  
900 Dobritsa, A.A. (2018). *Arabidopsis* protein kinase D6PKL3 is involved in formation of distinct  
901 plasma-membrane aperture domains on the pollen surface. *Plant Cell* *30*, 2038–2056.

- 902 Lee, B.H., Wang, R., Moberg, I.M., Reeder, S.H., Amom, P., Tan, M.H., Amstutz, K., Chandna,  
903 P., Helton, A., Andrianova, E.P., et al. (2021). A species-specific functional module controls  
904 formation of pollen apertures. *Nat. Plants* *In press*.
- 905 Letunic, I., and Bork, P. (2021). Interactive Tree Of Life (iTOL) v5: an online tool for  
906 phylogenetic tree display and annotation. *Nucleic Acids Res.*  
907 <https://doi.org/10.1093/nar/gkab301>  
908
- 909 Li, P., Ben-Menni Schuler, S., Reeder, S.H., Wang, R., Suárez Santiago, V., and Dobritsa, A.A.  
910 (2018). INP1 involvement in pollen aperture formation is evolutionarily conserved and may  
911 require species-specific partners. *J. Exp. Bot.* *69*, 983–996.
- 912 Lukowitz, W., Gillmor, C.S., and Scheible, W.-R. (2000). Positional cloning in *Arabidopsis*.  
913 Why it feels good to have a genome initiative working for you. *Plant Physiol.* *123*, 795–806.
- 914 Matamoro-Vidal, A., Prieu, C., Furness, C.A., Albert, B., and Gouyon, P.-H. (2016).  
915 Evolutionary stasis in pollen morphogenesis due to natural selection. *New Phytol* *209*, 376–394.
- 916 McElver, J., Patton, D., Rumbaugh, M., Liu, C., Yang, L.J., and Meinke, D. (2000). The *TITAN5*  
917 gene of *Arabidopsis* encodes a protein related to the ADP ribosylation factor family of GTP  
918 binding proteins. *Plant Cell* *12*, 1379–1393.
- 919 Nguyen, L.-T., Schmidt, H.A., von Haeseler, A., and Minh, B.Q. (2015). IQ-TREE: a fast and  
920 effective stochastic algorithm for estimating maximum-likelihood phylogenies. *Mol. Biol. Evol.*  
921 *32*, 268–274.
- 922 Plourde, S.M., Amom, P., Tan, M., Dawes, A.T., and Dobritsa, A.A. (2019). Changes in  
923 morphogen kinetics and pollen grain size are potential mechanisms of aberrant pollen aperture  
924 patterning in previously observed and novel mutants of *Arabidopsis thaliana*. *PLOS Comp. Biol.*  
925 *15*, e1006800.
- 926 Ravi, M., and Chan, S.W.L. (2010). Haploid plants produced by centromere-mediated genome  
927 elimination. *Nature* *464*, 615–618.
- 928 Reeder, S.H., Lee, B.H., Fox, R., and Dobritsa, A.A. (2016). A ploidy-sensitive mechanism  
929 regulates aperture formation on the *Arabidopsis* pollen surface and guides localization of the  
930 aperture factor INP1. *PLOS Genet.* *12*, e1006060.
- 931 Ressayre, A., Godelle, B., Raquin, C., and Gouyon, P.H. (2002). Aperture pattern ontogeny in  
932 Angiosperms. *J. Exp. Zool.(Mol. Dev. Evol.)* *294*, 122–135.
- 933 Scheffzek, K., Ahmadian, M.R., and Wittinghofer, A. (1998). GTPase-activating proteins:  
934 helping hands to complement an active site. *Trends Biochem. Sci.* *23*, 257–262.
- 935 Singh, M.K., and Jürgens, G. (2018). Specificity of plant membrane trafficking – ARFs,  
936 regulators and coat proteins. *Sem. Cell Dev. Biol.* *80*, 85–93.

- 937 Singh, M.K., Richter, S., Beckmann, H., Kientz, M., Stierhof, Y.-D., Anders, N., Fäßler, F.,  
938 Nielsen, M., Knöll, C., Thomann, A., et al. (2018). A single class of ARF GTPase activated by  
939 several pathway-specific ARF-GEFs regulates essential membrane traffic in Arabidopsis. *PLOS*  
940 *Genet.* *14*, e1007795.
- 941 Spielman, M., Preuss, D., Li, F.L., Browne, W.E., Scott, R.J., and Dickinson, H.G. (1997).  
942 *TETRASPORE* is required for male meiotic cytokinesis in *Arabidopsis thaliana*. *Development*  
943 *124*, 2645–2657.
- 944 Sztul, E., Chen, P.-W., Casanova, J.E., Cherfils, J., Dacks, J.B., Lambright, D.G., Lee, F.-J.S.,  
945 Randazzo, P.A., Santy, L.C., Schürmann, A., et al. (2019). ARF GTPases and their GEFs and  
946 GAPs: concepts and challenges. *MBoC* *30*, 1249–1271.
- 947 Turn, R.E., East, M.P., Prekeris, R., and Kahn, R.A. (2020). The ARF GAP ELMOD2 acts with  
948 different GTPases to regulate centrosomal microtubule nucleation and cytokinesis. *MBoC* *31*,  
949 2070–2091.
- 950 Vernoud, V., Horton, A.C., Yang, Z., and Nielsen, E. (2003). Analysis of the small GTPase gene  
951 superfamily of Arabidopsis. *Plant Physiol.* *131*, 1191–1208.
- 952 Walker, J.W. (1974). Aperture evolution in the pollen of primitive angiosperms. *Am. J. Bot.* *61*,  
953 1112–1137.
- 954 Wang, H., Yu, W.B., Chen, J.Q., and Blackmore, S. (2009). Pollen morphology in relation to  
955 floral types and pollination syndromes in *Pedicularis* (Orobanchaceae). *Plant Syst. Evol.* *277*,  
956 153.
- 957 Wang, S., Yoshinari, A., Shimada, T., Hara-Nishimura, I., Mitani-Ueno, N., Ma, J.F., Naito, S.,  
958 and Takano, J. (2017). Polar localization of the NIP5;1 boronic acid channel is maintained by  
959 endocytosis and facilitates boron transport in Arabidopsis roots. *Plant Cell* *29*, 824–842.
- 960 Wang, Z.-P., Xing, H.-L., Dong, L., Zhang, H.-Y., Han, C.-Y., Wang, X.-C., and Chen, Q.-J.  
961 (2015). Egg cell-specific promoter-controlled CRISPR/Cas9 efficiently generates homozygous  
962 mutants for multiple target genes in Arabidopsis in a single generation. *Genome Biol.* *16*, 144.
- 963 Wickett, N.J., Mirarab, S., Nguyen, N., Warnow, T., Carpenter, E., Matasci, N., Ayyampalayam,  
964 S., Barker, M.S., Burleigh, J.G., Gitzendanner, M.A., et al. (2014). Phylotranscriptomic analysis  
965 of the origin and early diversification of land plants. *Proc. Natl. Acad. Sci. USA* *111*, E4859–  
966 E4868.
- 967 Wodehouse, R.P. (1935). *Pollen grains: Their structure, identification and significance in science*  
968 *and medicine.* (New York and London: McGraw-Hill).
- 969 Xie, K., Zhang, J., and Yang, Y. (2014). Genome-wide prediction of highly specific guide RNA  
970 spacers for CRISPR-Cas9-mediated genome editing in model plants and major crops. *Mol. Plant*  
971 *7*, 923–926.



- 972 Xing, H.-L., Dong, L., Wang, Z.-P., Zhang, H.-Y., Han, C.-Y., Liu, B., Wang, X.-C., and Chen,  
973 Q.-J. (2014). A CRISPR/Cas9 toolkit for multiplex genome editing in plants. *BMC Plant Biol.*  
974 *14*, 327.
- 975 Xu, J., and Scheres, B. (2005). Dissection of Arabidopsis ADP-RIBOSYLATION FACTOR 1  
976 function in epidermal cell polarity. *Plant Cell* *17*, 525–536.
- 977 Yang, Z., and Lavagi, I. (2012). Spatial control of plasma membrane domains: ROP GTPase-  
978 based symmetry breaking. *Curr. Opin. Plant Biol.* *15*, 601–607.
- 979 Zhang, X., Zhao, G., Tan, Q., Yuan, H., Betts, N., Zhu, L., Zhang, D., and Liang, W. (2020).  
980 Rice pollen aperture formation is regulated by the interplay between OsINP1 and OsDAF1. *Nat.*  
981 *Plants* *6*, 394–403.
- 982 Zhou, Y., and Dobritsa, A.A. (2019). Formation of aperture sites on the pollen surface as a  
983 model for development of distinct cellular domains. *Plant Sci.* *288*, 110222.
- 984

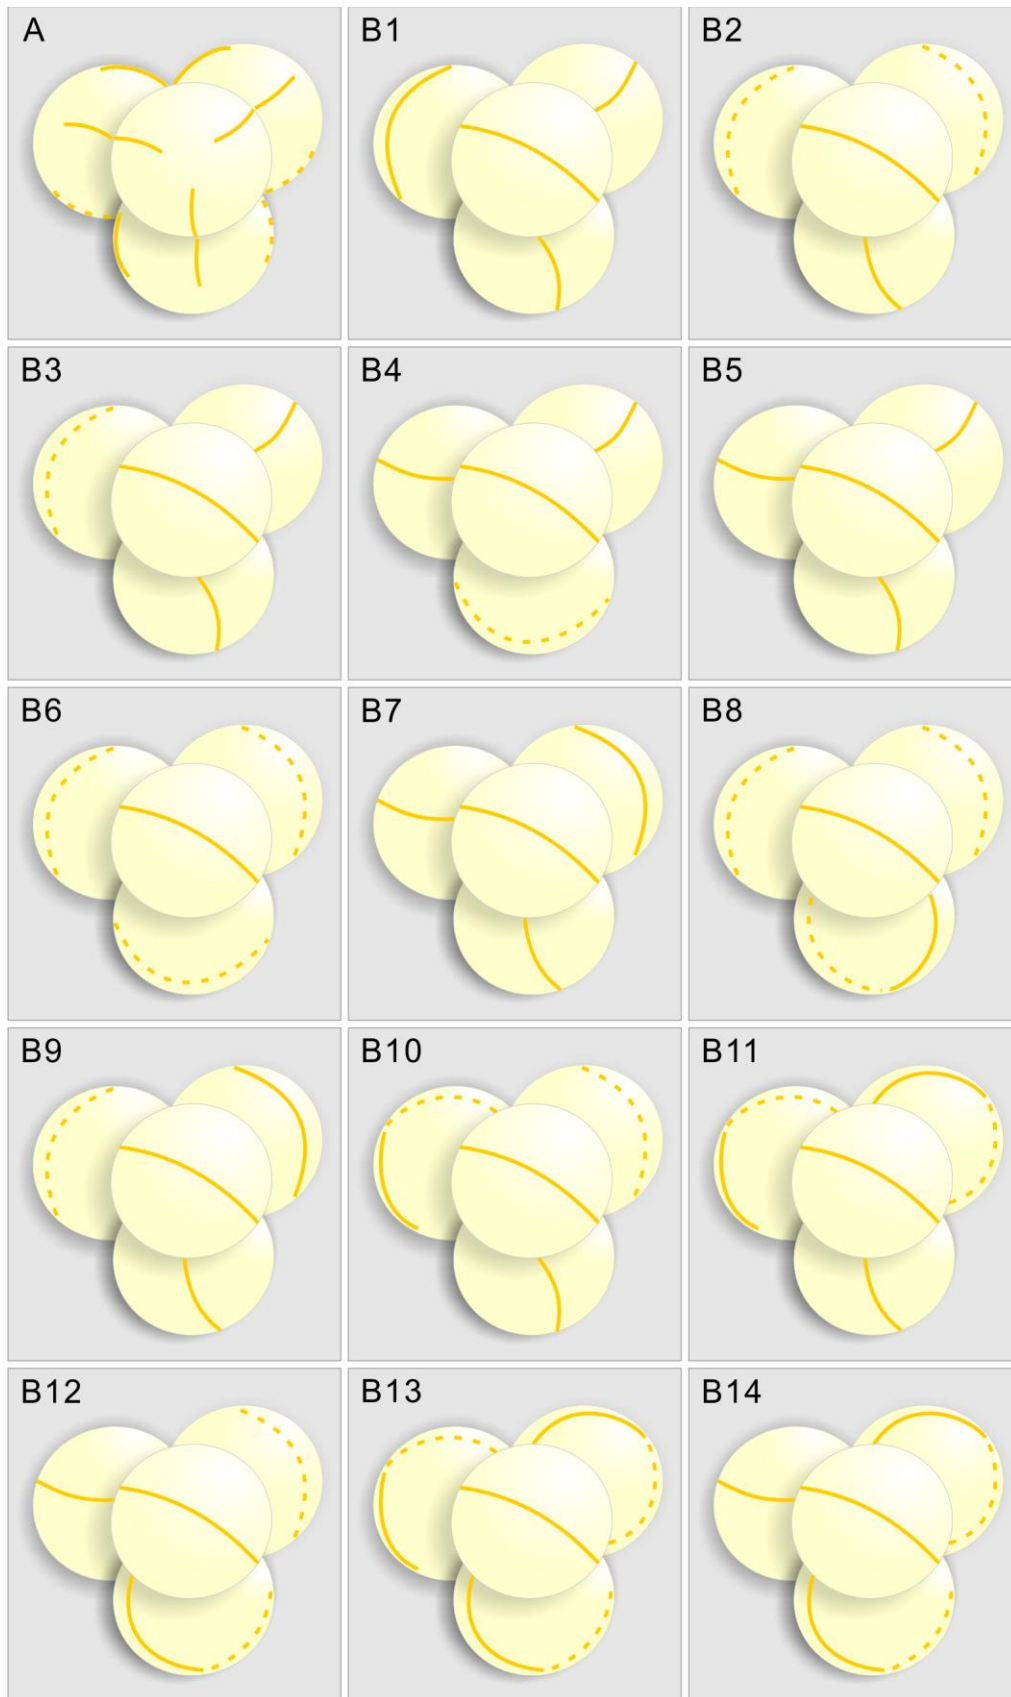

986 **Figure 1—figure supplement 1.** Diagrams summarizing the INP1-YFP localization in *inp1* and *mcr* tetrads, based  
987 on confocal imaging and 3-D reconstruction of *DMC1pr:INP1-YFP*-expressing tetrads. (A) Positions of three  
988 equidistant lines formed by INP1-YFP in tetrad-stage *inp1* microspores always appear coordinated between the  
989 sister microspores, with each line in one microspore facing a line in one of its sisters. (B) Examples of placement of  
990 INP1-YFP ring-shaped lines in 14 *mcr* tetrads, which suggest that the lines in sister microspores are positioned  
991 independently. In all tetrads, the INP1-YFP lines in front-facing microspores (with the polar axis perpendicular to  
992 the plane of image) were oriented the same way to compare the positioning of the lines in three sister microspores  
993 between the tetrads. Solid lines and dotted lines represent the INP1-YFP lines that are, respectively, visible and  
994 invisible in that view.  
995

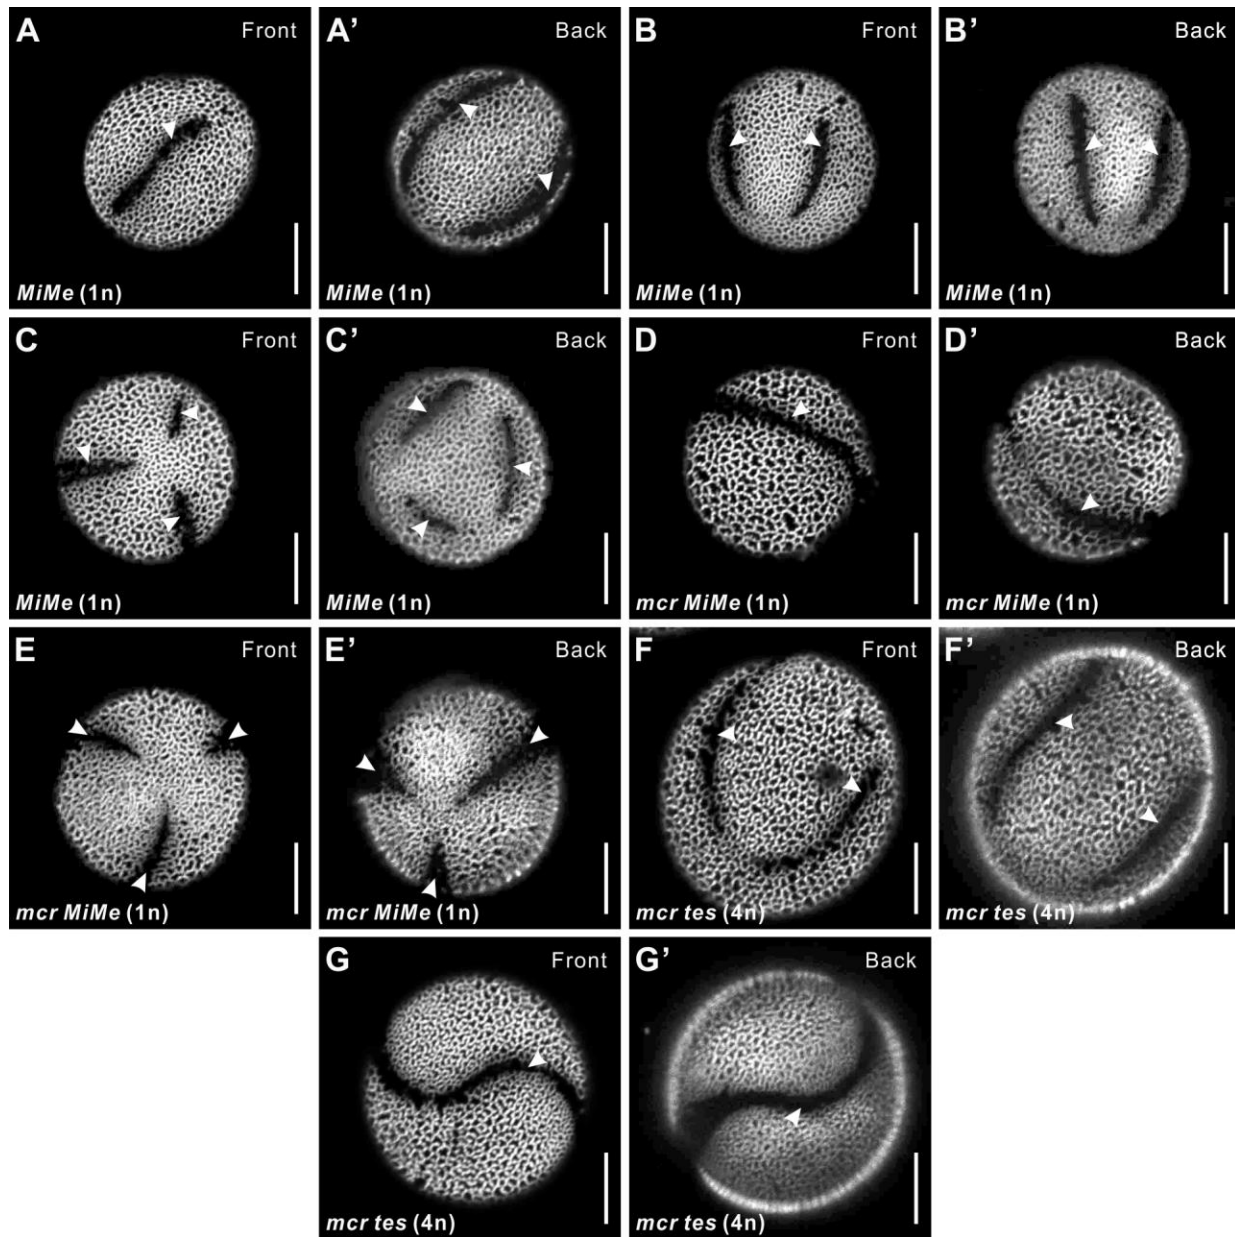

996  
997 **Figure 1—figure supplement 2.** The reducing effect of *mcr* mutations on aperture number is manifested across  
998 different ploidy levels and arrangements of microspores. (A–C') Representative images of 1n *MiMe* pollen with 3  
999 apertures (A–A'), 4 apertures (B–B'), and 6 apertures (C–C'). (D–E') Representative images of 1n *mcr MiMe*  
1000 pollen with *mcr*-like aperture (D–D') and 3 apertures (E–E'). (F–G') Representative images of 4n *mcr tes* pollen  
1001 with 4 apertures (F–F') and fused apertures (G–G'). Apertures are indicated with arrowheads. Scale bars, 10  $\mu$ m.

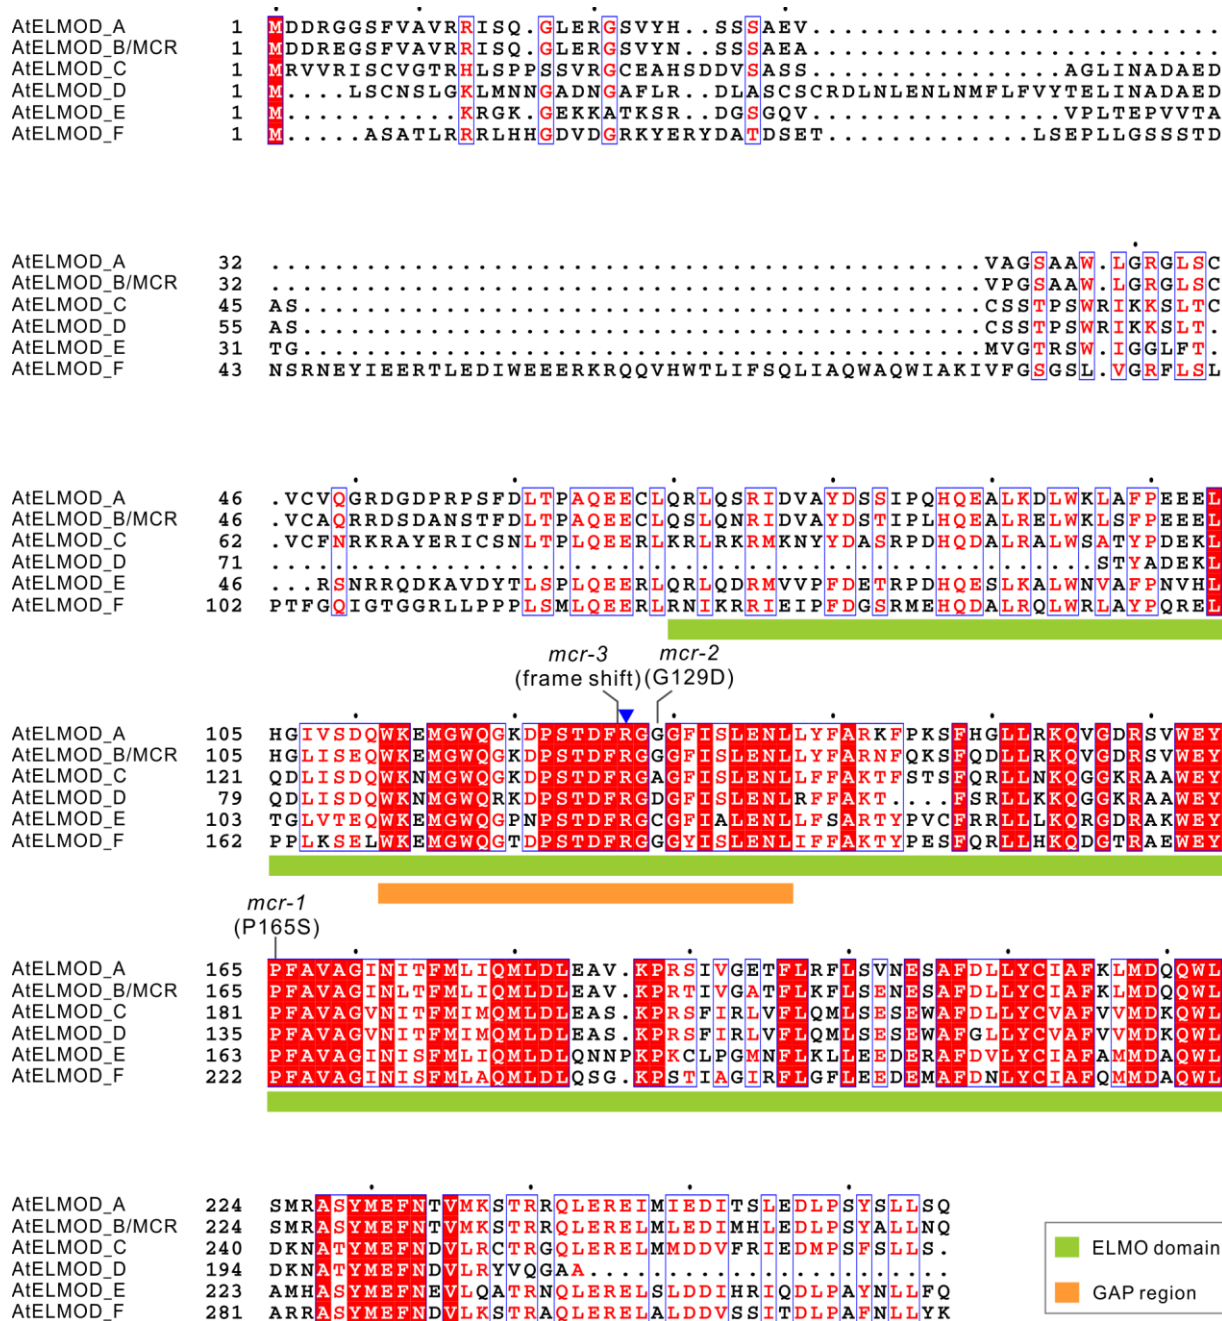

1002  
 1003 **Figure 3—figure supplement 1.** Protein sequence alignment of Arabidopsis ELMOD proteins. Multiple sequence  
 1004 alignment was conducted by MAFFT and visualized by Esprint3.0. Positions of ELMO domains and GAP regions in  
 1005 these proteins are indicated with a green box and an orange box, respectively. The mutated sites of *mcr-1*, *mcr-2*,  
 1006 and *mcr-3* are indicated. Blue triangle indicates the highly conserved Arg (R127 of MCR and ELMOD\_A) in the  
 1007 GAP region.



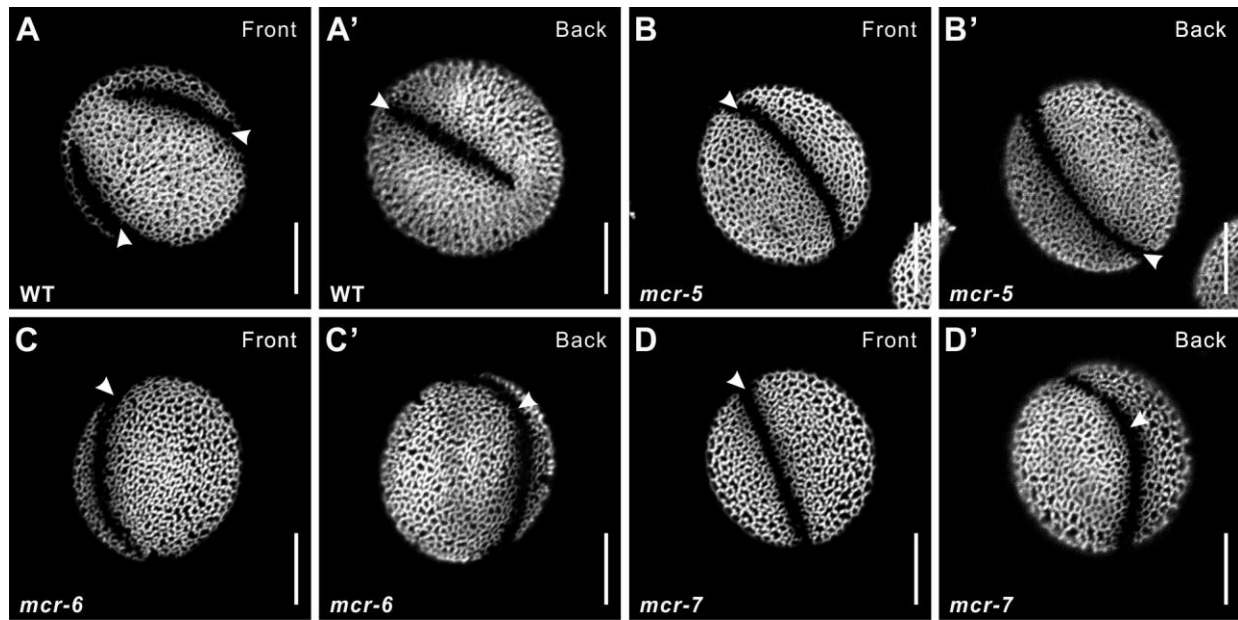

1008

1009 **Figure 3—figure supplement 2.** T-DNA insertion mutants of *MCR* produce pollen with a single ring-shaped  
1010 aperture. Pollen from wild type (A–A') and three T-DNA insertion alleles of *MCR* (B–D'). Apertures are indicated  
1011 with arrowheads. Scale bars, 10  $\mu$ m.

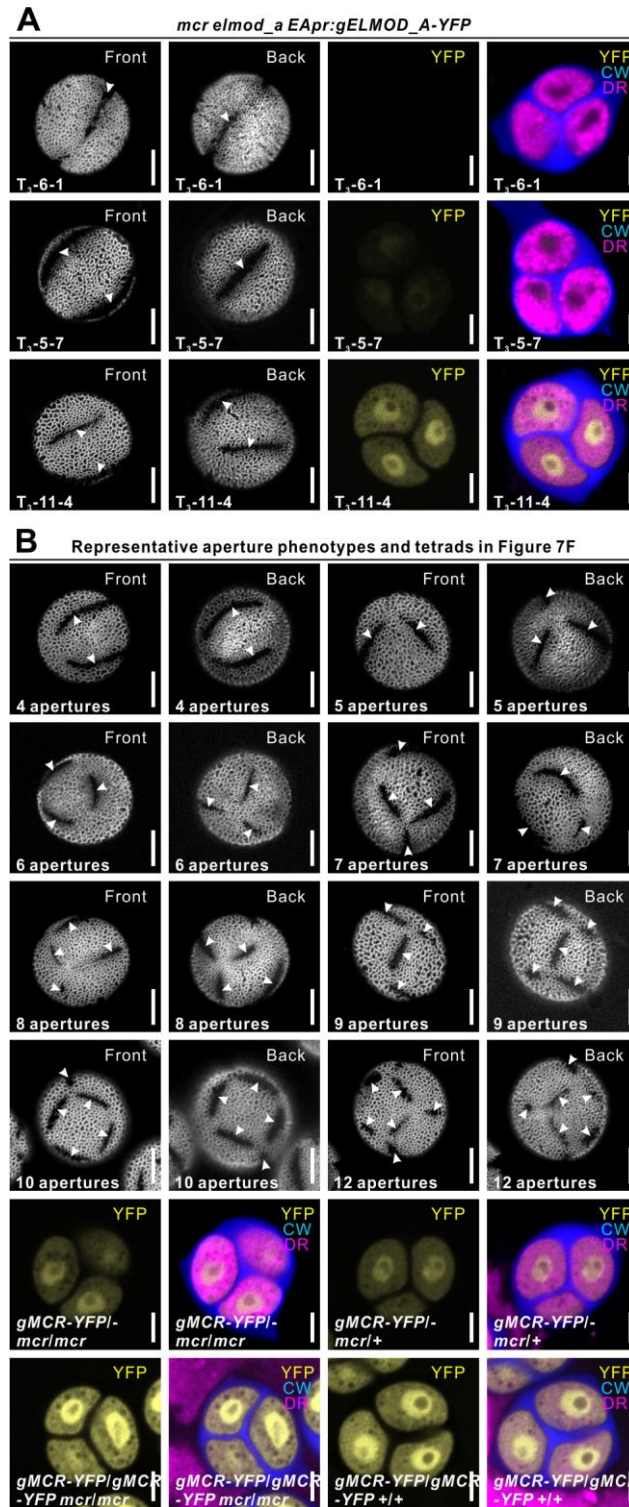

1012

1013 **Figure 7—figure supplement 1.** Representative aperture phenotypes and tetrads related to Figure 7. (A)  
 1014 Representative images of pollen grains and tetrads used in Figure 7D. (B) Representative images of pollen grains  
 1015 and tetrads used in Figure 7F. Apertures are indicated with arrowheads. Scale bars, 10  $\mu$ m for pollen and 5  $\mu$ m for  
 1016 tetrads.

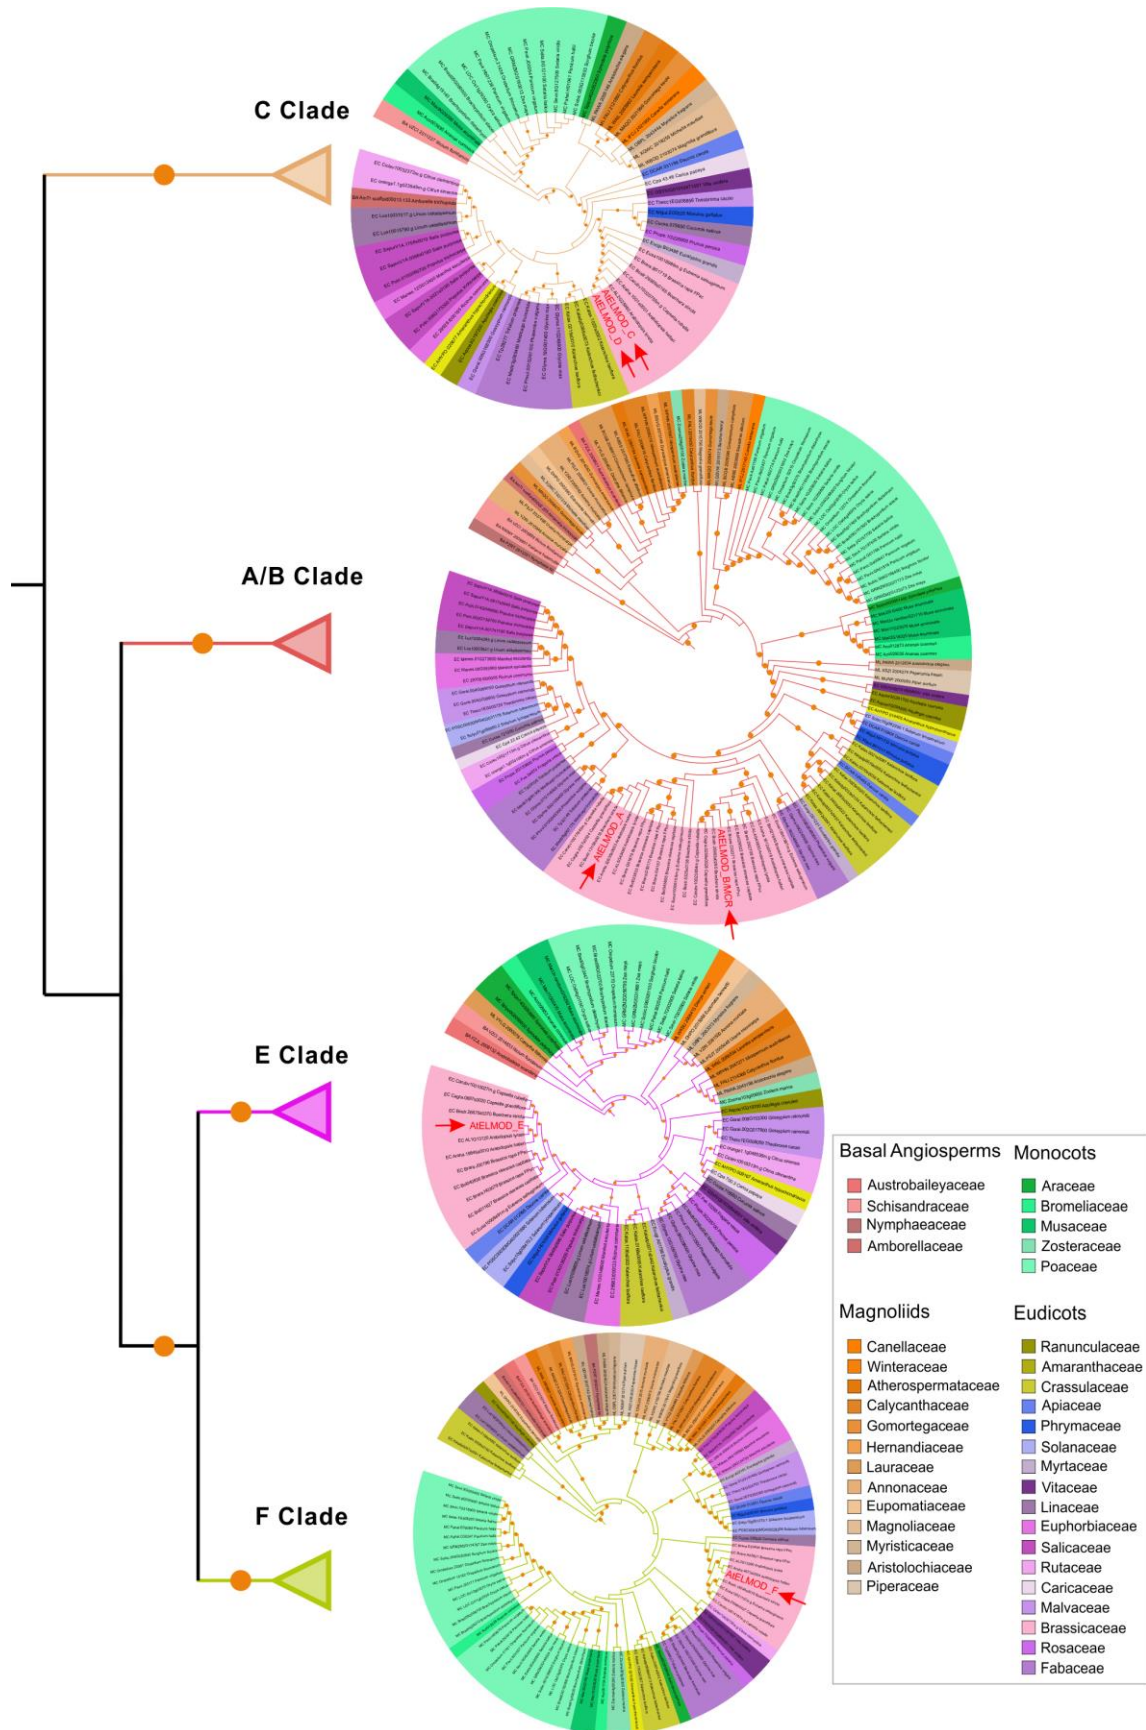

1018 **Figure 8—figure supplement 1.** Angiosperm ELMOD proteins cluster into four clades. Maximum likelihood  
1019 phylogenetic tree of ELMOD proteins from angiosperms. The four distinct clades have been collapsed and details of  
1020 each clade are presented as the pruned circular tree on the right. Label color shows the taxonomic group of each  
1021 protein as indicated on the right. Orange circles indicate bootstrap values higher than 70%. Red arrowheads indicate  
1022 the Arabidopsis ELMOD proteins. The complete tree can be accessed at <http://itol.embl.de/shared/Zhou3117>.  
1023



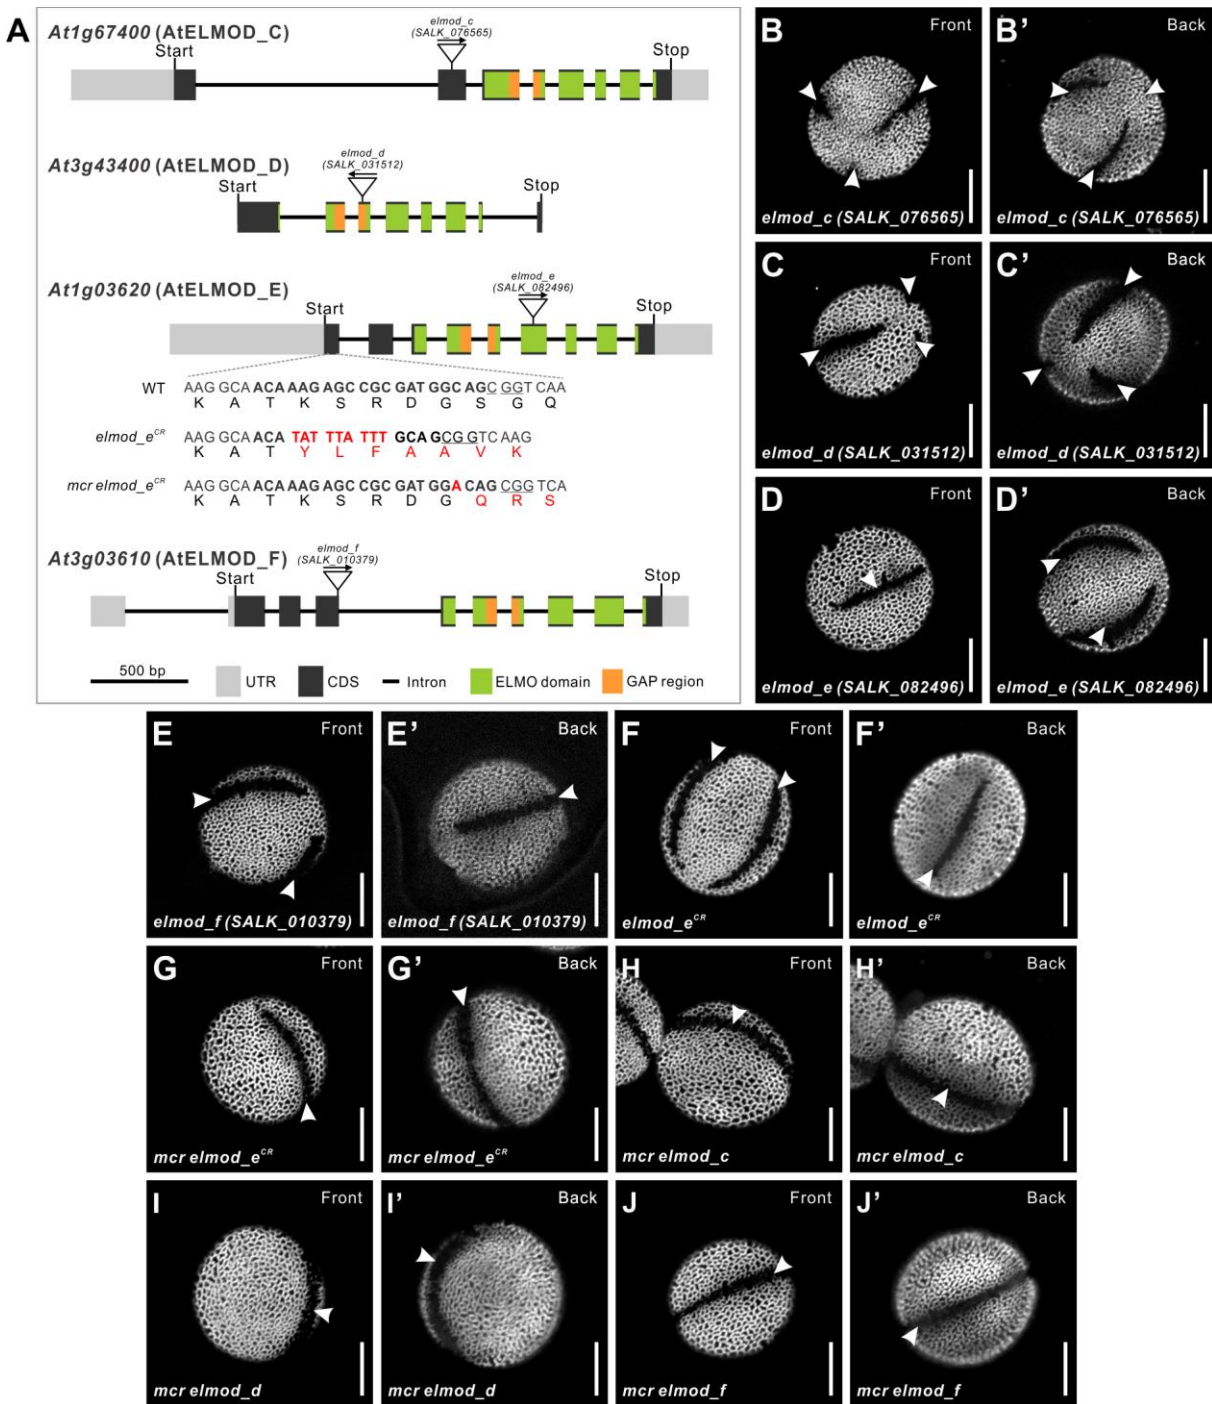

1024

1025 **Figure 9—figure supplement 1.** Disruptions of Arabidopsis *ELMOD\_C*, *ELMOD\_D*, *ELMOD\_E*, and *ELMOD\_F*

1026 do not affect aperture patterns. (A) Diagram of the *ELMOD\_C* (*At1g67400*), *ELMOD\_D* (*At3g43400*), *ELMOD\_E*

1027 (*At1g03620*), and *ELMOD\_F* (*At3g03610*) genes. T-DNA insertion sites are indicated for each gene. For

1028 *ELMOD\_E*, CRISPR alleles (*elmod-e<sup>CR</sup>*) generated in the wild-type and *mcr* backgrounds are shown. The 20-bp

1029 target sequence next to the underlined protospacer adjacent motif is indicated in bold. Nucleotide and amino acid

1030 changes are indicated with red capital letters. (B–F') Pollen grains of single T-DNA insertion mutants of

1031 *ELMOD\_C*, *ELMOD\_D*, *ELMOD\_E*, *ELMOD\_F* and the CRISPR/Cas9 mutant of *ELMOD\_E* (*elmod\_e<sup>CR</sup>*). (G–J')



1032 Pollen grains of the double mutants *mcr elmod\_e<sup>CR</sup>* (G–G'), *mcr elmod\_c* (H–H'), *mcr elmod\_d* (I–I'), and *mcr*  
1033 *elmod\_f* (J–J'). Apertures are indicated with arrowheads. Scale bars, 10  $\mu$ m.

1034

1035

1036

1037

1038

1039

1040

1041

1042

1043

1044

1045

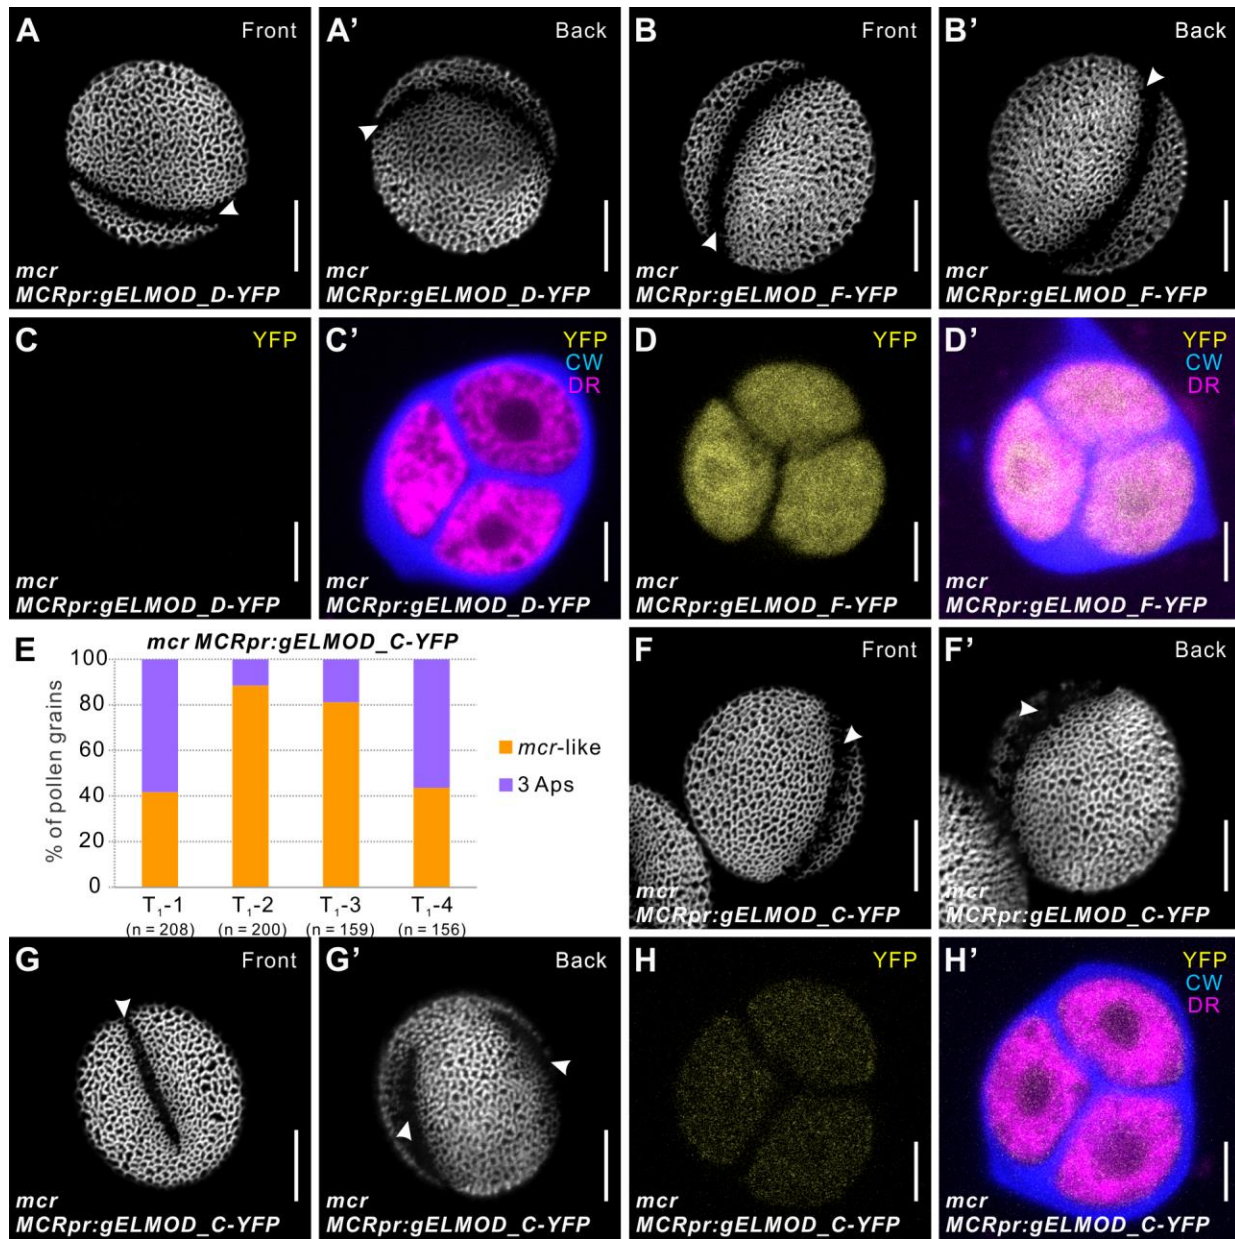

1046

1047

1048

1049

1050

1051

1052

1053

1054

1055

**Figure 9—figure supplement 2.** ELMOD\_C, but not ELMOD\_D and ELMOD\_F, can partially substitute for MCR in aperture formation. (A–B' and F–G') Pollen grains from *mcr MCRpr:gELMOD\_D-YFP* (A–A'), *mcr MCRpr:gELMOD\_F-YFP* (B–B'), and *mcr MCRpr:gELMOD\_C-YFP* (F–G'). (C–D' and H–H') Confocal images of *mcr* tetrads expressing YFP fusions of ELMOD\_C, ELMOD\_D, and ELMOD\_F. (C–C') There is no observable YFP fluorescence in the *mcr* tetrads expressing *MCRpr:gELMOD\_D-YFP*. (D–D') *mcr* tetrads expressing *MCRpr:gELMOD\_F-YFP* show strong YFP fluorescence. (H–H') *mcr* tetrads expressing *MCRpr:gELMOD\_C-YFP* have detectable YFP fluorescence. Adjacent panels show YFP fluorescence ( $\alpha$ ) and merged fluorescent signal ( $\alpha'$ ) from YFP, Calcofluor White (CW), and CellMask Deep Red (DR). (E–E') Percentage of pollen grains with indicated number of apertures in pollen populations from the T<sub>1</sub> plants of *mcr MCRpr:gELMOD\_C-YFP*. Number of

1056 analyzed pollen grains is indicated. Apertures are indicated with arrowheads. Scale bars, 10  $\mu$ m for pollen and 5  $\mu$ m  
1057 for tetrads.

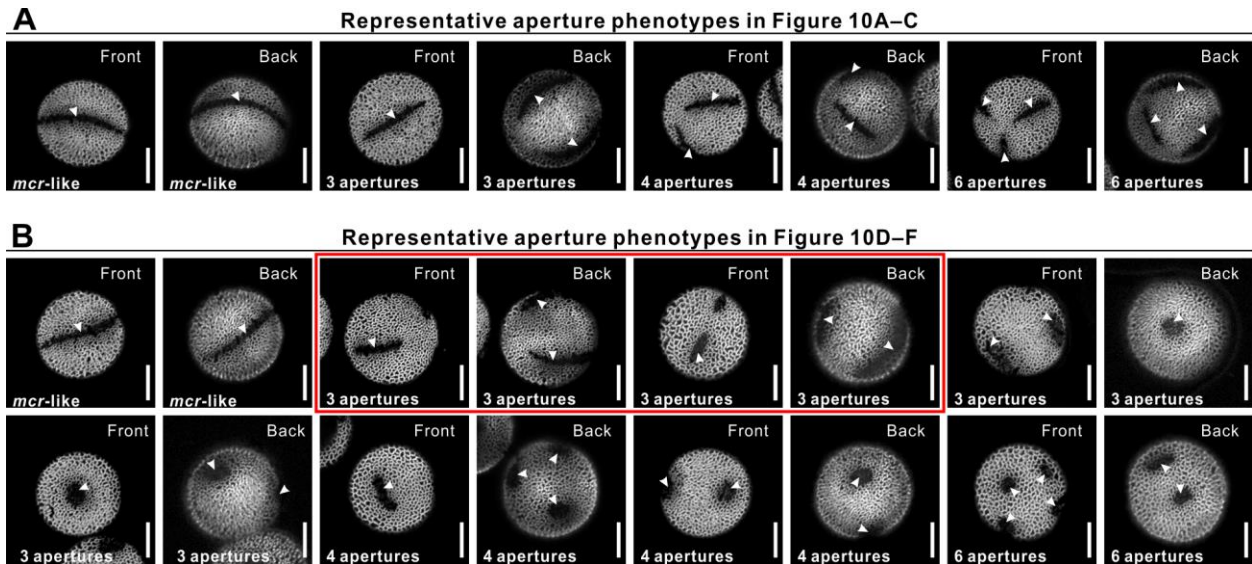

1058 **Figure 10—figure supplement 1.** Representative aperture phenotypes observed in  $T_1$  plants related to Figure 10.  
1059 (A) Representative aperture phenotypes (all furrows) observed in  $T_1$  plants related to Figure 10A–C. (B) More  
1060 diverse aperture phenotypes observed in  $T_1$  plants related to Figure 10D–F. Red box highlights the most common  
1061 aperture morphologies of three normal or, sometimes, disconnected furrows observed in the  $T_1$  plants related to  
1062 Figure 10D. Three round apertures were only found in the  $T_1$  plants related to Figure 10E and Figure 10F.  $\geq 4$   
1063 apertures were mostly round. Apertures are indicated with arrowheads. Scale bars, 10  $\mu$ m.  
1064  
1065
